# 1 **Structural basis of SNAPc-dependent snRNA** 2 **transcription initiation by RNA polymerase II**

3  
4 **Srinivasan Rengachari<sup>1</sup>, Sandra Schilbach<sup>1</sup>, Thangavelu Kaliyappan<sup>2</sup>, Jerome Gouge<sup>2</sup>,**  
5 **Kristina Zumer<sup>1</sup>, Juliane Schwarz<sup>3,4</sup>, Henning Urlaub<sup>3,4</sup>, Christian Dienemann<sup>1</sup>,**  
6 **Alessandro Vannini<sup>2,5\*</sup> and Patrick Cramer<sup>1\*</sup>**

7  
8 <sup>1</sup> *Department of Molecular Biology, Max Planck Institute for Multidisciplinary Sciences, Am*  
9 *Fassberg 11, 37077 Göttingen, Germany.*

10 <sup>2</sup> *Division of Structural Biology, The Institute of Cancer Research, London, SW7 3RP, UK*

11 <sup>3</sup> *Max Planck Institute for Multidisciplinary Sciences, Bioanalytical Mass Spectrometry,*  
12 *Göttingen, Germany*

13 <sup>4</sup> *University Medical Center Göttingen, Institute of Clinical Chemistry, Bioanalytics Group,*  
14 *Göttingen, Germany*

15 <sup>5</sup> *Human Technopole, 20157, Milan, Italy*

16 \*Correspondence: [alessandro.vannini@fht.org](mailto:alessandro.vannini@fht.org); [patrick.cramer@mpinat.mpg.de](mailto:patrick.cramer@mpinat.mpg.de)

17  
18 **RNA Polymerase II (Pol II) carries out transcription of both protein-coding and non-**  
19 **coding genes. Whereas Pol II initiation at protein-coding genes has been studied in detail,**  
20 **Pol II initiation at non-coding genes such as small nuclear RNA (snRNA) genes is not**  
21 **understood at the structural level. Here we study Pol II initiation at snRNA gene**  
22 **promoters and show that the snRNA-activating protein complex (SNAPc) enables DNA**  
23 **opening and transcription initiation independent of TFIIE and TFIIH *in vitro*. We then**  
24 **resolve cryo-EM structures of the SNAPc-containing Pol II preinitiation complex (PIC)**  
25 **assembled on U1 and U5 snRNA promoters. The core of SNAPc binds two turns of DNA**  
26 **and recognizes the snRNA promoter-specific proximal sequence element (PSE) located**  
27 **upstream of the TATA box-binding protein TBP. Two extensions of SNAPc called wing-**  
28 **1 and wing-2 bind TFIIA and TFIIIB, respectively, explaining how SNAPc directs Pol II**  
29 **to snRNA promoters. Comparison of structures of closed and open promoter complexes**  
30 **elucidates TFIIH-independent DNA opening. These results provide the structural basis of**  
31 **Pol II initiation at non-coding RNA gene promoters.**

32  
33 Transcription by RNA polymerase II (Pol II) has been structurally well studied for protein-  
34 coding genes that produce messenger RNA (mRNA)<sup>1-4</sup>. Pol II however also carries out  
35 transcription of non-coding small nuclear RNAs (snRNAs) that are an integral part of the pre-  
36 mRNA splicing machinery<sup>5</sup>. Pol II transcribes four of the five snRNAs, namely U1, U2, U4  
37 and U5 snRNAs, whereas Pol III transcribes U6 snRNA<sup>6</sup>. In contrast to the Pol III-dependent  
38 snRNA promoter, Pol II-dependent snRNA promoters lack a TATA box motif<sup>7</sup>. To produce  
39 snRNAs, Pol II uses many of its accessory factors that are used for mRNA synthesis, but  
40 additionally requires specific factors for transcription initiation and elongation<sup>8</sup>.

41 Transcription initiation of snRNA genes relies on a specific factor called snRNA-  
42 activating protein complex (SNAPc). SNAPc binds a DNA motif in the upstream region of  
43 snRNA promoters, the so-called proximal sequence element, or PSE<sup>9</sup>. Human SNAPc contains

## Rengachari et al.: Structure of SNAPc-containing Pol II PIC

44 five subunits – SNAPC1, SNAPC2, SNAPC3, SNAPC4 and SNAPC5. The subunits SNAPC1,  
45 SNAPC3 and SNAPC4 form the core of SNAPc<sup>10</sup>, of which SNAPC3 and SNAPC4 possess  
46 DNA-binding function<sup>11,12</sup>. The core subunits of SNAPc are conserved and have been  
47 characterized in *Drosophila melanogaster* and *Trypanosoma brucei*, where they are sufficient  
48 for activating snRNA transcription<sup>13,14</sup>. SNAPC2 and SNAPC5 however contribute to the  
49 stability and activity of SNAPc<sup>10,15,16</sup>.

50 The initiation of SNAPc-regulated Pol II snRNA transcription was reported to rely on  
51 the general transcription factors (GTFs) TBP, TFIIA, TFIIB, TFIIE and TFIIF<sup>17,18</sup>. The role of  
52 TFIIH in Pol II snRNA transcription remains unclear<sup>17</sup>, although TFIIH is known to be required  
53 for DNA opening at promoters of protein-coding genes<sup>19</sup>. The structure of SNAPc and its  
54 molecular interactions with the Pol II pre-initiation complex (PIC) are also unknown. As a  
55 consequence, the structural basis and the mechanism of snRNA transcription initiation remains  
56 to be uncovered. Here we report structures of SNAPc-containing Pol II PICs bound to U1 and  
57 U5 snRNA promoters. Our results show how SNAPc is structured, how it recognizes the PSE,  
58 and how it positions a core Pol II PIC on snRNA promoters for DNA opening and transcription  
59 initiation. More generally, this work adds to our understanding of the evolution of the three  
60 eukaryotic transcription systems.

61

## 62 RESULTS

### 63 Preparation of functional SNAPc

64 We prepared two variants of recombinant human SNAPc, namely SNAPc-FL containing all  
65 full-length subunits and SNAPc-core<sup>10</sup>, containing SNAPC1, SNAPC3, SNAPC4 (residues 1-  
66 516) and SNAPC5 (**Figure 1a**) (Methods). Both purified SNAPc variants were able to bind U1  
67 and U5 snRNA promoter DNA (RNU1 and RNU5), both in the absence and in the presence of  
68 TBP and TFIIB in an electrophoretic mobility shift assay (EMSA) (**Figure 1b**). EMSA also  
69 showed that the SNAPc variants could facilitate binding of TBP to snRNA promoters that lack  
70 a TATA box (**Figure 1b, 2a**), consistent with previous studies<sup>20</sup>.

71 To test whether recombinant SNAPc could mediate Pol II transcription initiation from  
72 snRNA gene promoters, we used an *in vitro* transcription assay. The assay showed that Pol II  
73 could initiate transcription from a U1 promoter in the presence of TBP, TFIIA, TFIIB and TFIIF  
74 and was stimulated ~4.5 fold and ~2.5 fold by the addition of SNAPc-FL or SNAPc-core,  
75 respectively (**Figure 1d, e**). Addition of TFIIE reduced this increase in transcription activity to  
76 ~1.5 fold and ~1.2 fold for SNAPc-FL and SNAPc-core, respectively (**Figure 1e**), suggesting  
77 that TFIIE is not required for SNAPc-dependent transcription initiation and rather inhibitory in  
78 our biochemical system. Further addition of TFIIH did override the stimulatory effect of  
79 SNAPc and led to formation of non-specific transcripts at multiple sites (**Figure 1d**). In  
80 conclusion, our recombinant SNAPc variants stimulate Pol II transcription initiation from  
81 snRNA gene promoters in the absence of TFIIE and TFIIH *in vitro*.

82

### 83 Cryo-EM analysis of SNAPc-containing PICs

84 Based on these observations we reconstituted a functional SNAPc-containing Pol II PIC on a  
85 U1 promoter DNA (Methods). We incubated SNAPc-core and *S. scrofa* Pol II (99.9% identical  
86 to human Pol II) with human TBP, TFIIA, TFIIB, TFIIE and TFIIF, and subjected the resulting  
87 complex to sucrose-gradient ultracentrifugation. Peak fractions contained apparent  
88 stoichiometric amounts of Pol II, SNAPc-core and the general transcription factors, indicating

## Rengachari et al.: Structure of SNAPc-containing Pol II PIC

89 formation of a stable 24-subunit SNAPc-containing PIC (**Figure 1c**). The sample was  
90 crosslinked<sup>21</sup> and subjected to cryo-EM analysis (Methods). Initial trials showed that the PIC  
91 containing the SNAPc-FL variant was less stable (**Figure 1c**), whereas the PIC containing  
92 SNAPc-core was stable and suited for cryo-EM analysis, leading to a high-resolution single  
93 particle dataset (**Extended Data Table 1**).

94 Reconstructions from 3D classification of this dataset showed two distinct particle  
95 classes of the SNAPc-containing Pol II PIC (**Extended Data Figure 1**). Further 3D  
96 classification and refinement identified these two states as the closed promoter complex (CC)  
97 and the open promoter complex (OC) states of the PIC. We obtained structures of the CC and  
98 OC states at an overall resolution of 3.4 Å and 3.0 Å, respectively (**Extended Data Figure 1,**  
99 **3**). None of our maps revealed density for TFIIE, consistent with our in vitro transcription  
100 assays that showed TFIIE was not required for initiation (**Figure 1d, e**). Densities for SNAPc  
101 and upstream DNA containing the PSE were improved by focussed 3D classification and  
102 masked refinements. The local resolution for this region was 3.5 Å for the OC state (**Extended**  
103 **Data Figure 1, 3**).

104 In an effort to obtain a high-resolution structure of SNAPc, we additionally  
105 reconstituted a SNAPc-containing Pol II PIC on a DNA that was based on the U5 promoter  
106 sequence (Methods). The resulting cryo-EM dataset enabled refinement of the SNAPc-  
107 containing PIC in the CC state at an overall resolution of 3.0 Å and with the local map of the  
108 upstream region extending to 3.2 Å (**Extended Data Figure 2, 3**). The local map enabled  
109 building of an atomic model for SNAPc and PSE-containing upstream DNA (Methods). We  
110 then combined the resulting model with the known high-resolution structures of mammalian  
111 Pol II PIC in CC and OC states<sup>22</sup>. After manual adjustment, refined structures of the SNAPc-  
112 containing PIC in the CC and OC states containing the U1 and U5 promoters showed good  
113 stereochemistry resulting in a total of three structures (**Extended Data Table 1**).

114

### 115 **Overall structure of SNAPc-containing PIC**

116 The overall structure of the SNAPc-containing Pol II PIC shows that SNAPc binds the promoter  
117 DNA upstream of TBP (**Figure 2**). SNAPc recognizes the PSE motif and interacts with TFIIA  
118 and TFIIB. Despite these multiple interactions, the presence of SNAPc does not alter the  
119 canonical core PIC structure in any substantial way<sup>22</sup>. TBP binds to the AGGCTG sequence at  
120 register -30 to -25 bp (**Figure 2a**) of the TATA-less U1 promoter and bends the DNA by 90°  
121 similar to what is observed in a TBP-TATA DNA complex<sup>23,24</sup> (**Extended Data Figure 4a**). In  
122 the following, we will first describe the SNAPc structure and SNAPc-DNA interactions based  
123 on the U5-containing CC structure that is resolved at the highest resolution. We will then  
124 describe promoter opening based on the CC and OC structures of the U1-containing PIC.

125

### 126 **SNAPc structure contains two protruding wings**

127 The high-resolution structure of the SNAPc core bound to the U5 promoter shows how the  
128 subunits SNAPC1, SNAPC3 and SNAPC4 fold and interact (**Figure 3**). SNAPC1 possesses an  
129 N-terminal VHS/ENTH-like domain<sup>25</sup> that forms a mainly helical structure (**Extended Data**  
130 **Figure 4b**). SNAPC3 is saddle-shaped with a central ‘ubiquitin-like domain’ (ULD) and  
131 additional  $\alpha$ -helices and  $\beta$ -strands (**Extended Data Figure 4c**). Consistent with biochemical  
132 studies<sup>26</sup>, SNAPC3 contains two zinc fingers (ZF-1 and ZF-2). ZF-1 is a C2H2 type zinc finger  
133 with residues Cys221, His313, Cys317 and His319 coordinating a Zn<sup>2+</sup> ion (**Extended Data**

134 **Figure 5f**). ZF-2 is a C4 type zinc finger with residues Cys354, Cys357, Cys380, Cys383  
135 coordinating another  $Zn^{2+}$  ion (**Extended Data Figure 5g**). SNAPC4 contains four complete  
136 repeats (R1-R4) and a half repeat (Rh) of the Myb domain<sup>12</sup>, of which we observe Rh, R1 and  
137 R2 (residues 274-398) (**Figure 3b, Extended Data Figure 4d**). R1 and R2 contain three helices  
138 forming canonical helix-turn-helix folds. The SNAPc core is stabilized by intricate interactions  
139 of SNAPC3 with both SNAPC1 and SNAPC4. The N-terminal region of SNAPC3 interacts  
140 mainly with SNAPC1, burying a surface area of  $\sim 1640 \text{ \AA}^2$ . The C-terminal region of SNAPC3  
141 binds SNAPC4 and buries  $\sim 3010 \text{ \AA}^2$ . A total of four subunit interfaces are formed based on  
142 hydrophobic interactions, salt bridges and polar contacts (**Figure 3c-f, Extended Data Figure**  
143 **7**).

144 SNAPc also contains two protrusions that we refer to as ‘wing-1’ and ‘wing-2’. The  
145 wing-1 of SNAPc consists of a pair of helices that precede the Rh region of SNAPC4 (residues  
146 184-256). The wing-2 of SNAPc is a four-helix bundle that is formed by two helices of  
147 SNAPC1 (residues 162-234) and one helix each of SNAPC4 (residues 81-125) and SNAPC5  
148 (residues 1-51) (**Extended Data Figure 4e**). Although the resolution in wing-2 is limited due  
149 to mobility, AlphaFold2 prediction<sup>27</sup> and prior biochemical studies<sup>16</sup> led to a reliable model of  
150 wing-2 that we confirmed by crosslinking mass-spectrometry (**Extended Data Figure 5k, 6**).  
151 In conclusion, these efforts provided the structure of SNAPc, which contains a three-subunit  
152 core and two protruding wings extending from the core.

153

#### 154 **SNAPc core recognizes the snRNA promoter**

155 Our U5-containing CC structure also reveals details of how SNAPc binds the PSE motif in  
156 promoter DNA (**Figure 4a**). The SNAPc core binds to the PSE motif through its subunits  
157 SNAPC3 and SNAPC4 (**Extended Data Figure 8a**), consistent with biochemical data<sup>11,28</sup>.  
158 SNAPc contacts promoter DNA 8 bp upstream of the proximal edge of the TBP-binding site  
159 (**Figure 4b, c**). The register of the modelled snRNA promoter is defined by the nucleotide on  
160 the non-template (NT) strand at the upstream edge of TBP binding site starting at  $-30$ ,  
161 ascending in the 5' to 3' direction. SNAPC3 and SNAPC4 both bind this region through  
162 contacts with the DNA backbone and bases on both strands of the PSE (**Extended Data Figure**  
163 **8a**). DNA binding occurs both to the major and minor grooves. SNAPC3 inserts its helix  $\alpha 8$   
164 into the major groove and forms multiple contacts with DNA. K199 forms salt bridges with the  
165 backbone phosphates of nucleotide G9 on the template strand. The residue K194 of the same  
166 helix forms ionic interactions with the O6 atom of the nucleotide bases G  $-42$  and G  $-43$  of the  
167 NT strand. Further downstream, H198 establishes hydrophobic contacts with the nucleotide  
168 base T  $-45$  on the template strand (**Figure 4b**).

169 Since most of these protein-DNA contacts are to the DNA backbone, the question arises  
170 how SNAPc can recognize the PSE. Our structure suggests that recognition is at least partially  
171 achieved by indirect readout. In particular, the DNA major groove is locally distorted at the  
172 PSE and differs from canonical B-DNA at registers  $-51$  to  $-41$  (**Extended Data Figure 8b**).  
173 At the position where SNAP3 helix  $\alpha 8$  is inserted into the major groove, the duplex geometry  
174 resembles A-form DNA<sup>29</sup> (**Extended Data Figure 8c**). This deviation is also reflected in the  
175 minor grooves upstream and downstream of this site (**Extended Data Figure 8a, d**).

176 SNAPc also binds the minor groove of DNA with subunits SNAPC3 and SNAPC4.  
177 Q152 of SNAPC3 forms hydrogen bond with the nucleotide base T  $-48$  of NT strand while  
178 SNAPC4 residue Y372 interacts hydrophobically with the C3 atom of backbone sugar of the



## Rengachari et al.: Structure of SNAPc-containing Pol II PIC

179 nucleotide base A –50 of the template strand. Arginine residues R148 and R151 of SNAPC3  
180 and R373 of SNAPC4 form salt bridges with the DNA backbone (**Figure 4c**). Our structure  
181 also shows that the SNAPC4 Myb repeat R2 binds DNA via its helix  $\alpha$ 15 that contacts the  
182 anterior major groove, and early biochemical studies indicated that the Myb repeats R3 and R4  
183 are involved in DNA binding<sup>12</sup>. I388 establishes hydrophobic interactions with the nucleotide  
184 base A –50 and the C5 atom of nucleotide C –51 on the template strand. The neighbouring  
185 Y389 residue forms hydrogen bonds with the N7 atom of A –55 and hydrophobic interaction  
186 with T –54 of the NT strand (**Figure 4c**). The residues K347, R373 and R390 of SNAPC4  
187 interact with the DNA backbone. Although biochemical studies had identified SNAPC3 and  
188 SNAPC4 as poor DNA binders when investigated in isolation<sup>10,11</sup>, our results suggest that  
189 formation of the SNAPc complex with its intricate interactions between these two subunits  
190 enables tight binding of the PSE which explains how SNAPc recognizes the snRNA promoter.  
191

### 192 **The wings of SNAPc bind TFIIA and TFIIB**

193 SNAPc also interacts with TFIIA and TFIIB that flank TBP in the PIC (**Figures 5, Extended**  
194 **Data Figure 8a**). Whereas wing-1 of SNAPc binds to TFIIA, wing-2 binds TFIIB (**Extended**  
195 **Data Figure 8a**). SNAPc interaction with TFIIA and TFIIB involves three interfaces that we  
196 call A, B and C. In interface A, the wing-1 of SNAPC4 (helices  $\alpha$ 4,  $\alpha$ 5) slides under the four-  
197 helix bundle of TFIIA like a wedge, stabilizing the flexible bundle region (**Figure 5a**). SNAPC4  
198 additionally interacts with the  $\beta$ -barrel of TFIIA to form interface B (**Figure 5a**). Interfaces A  
199 and B are formed by a combination of hydrophobic interactions, salt bridges and polar contacts.  
200 Incidentally, the TFIIA bundle has also been shown to interact with TAF4 and TAF12 in lobe  
201 B of the multisubunit TFIID complex that, like SNAPc, is important for promoter recognition<sup>30</sup>.  
202 Interface C is formed between wing-2 and the C-terminal cyclin fold of the TFIIB core (**Figure**  
203 **5b**). The wing-2 helices from SNAPC1 and SNAPC5 form contacts with the terminal  $\alpha$ -helix  
204 of the TFIIB core. Interface C stabilizes the TFIIB core, which was suggested to play a key role  
205 in the activation of snRNA transcription initiation<sup>7</sup>. Together, SNAPc wing-1 and wing-2 bind  
206 TFIIA and TFIIB, respectively, to position the core PIC with respect to SNAPc and the PSE  
207 promoter element.  
208

### 209 **Promoter DNA opening**

210 Comparison of our CC and OC structures bound to the U1 promoter provides insights into the  
211 mechanism of TFIIE- and TFIIF-independent DNA opening (**Figure 6**). Overall, closed and  
212 open U1 promoter DNA follow trajectories within the Pol II cleft that are comparable to those  
213 observed for protein-coding promoter DNA in PIC structure<sup>22</sup>. Also, as observed in PIC  
214 structures lacking SNAPc<sup>2,22</sup>, the OC state is associated with a closed Pol II clamp and an  
215 ordered B-reader and B-linker elements in TFIIB (**Figure 6b**). However, DNA opening can  
216 also be achieved spontaneously in the absence of TFIIE and TFIIF at some protein-coding  
217 genes in yeast<sup>31</sup>, and such spontaneous opening depends on the DNA duplex stability around  
218 the transcription start site (TSS)<sup>32</sup>. Studies in yeast Pol II have further shown that an AT-rich  
219 sequence increases the propensity of spontaneous promoter opening during transcription  
220 initiation<sup>31</sup>. Similarly, we find that promoter sequences of snRNA-encoding genes are AT-rich  
221 in the initially melted region (IMR) spanning positions –8 to +2 around the TSS (position +1)  
222 (**Extended Data Figure 8e**). We propose that the AT-rich nature of the IMR enables

223 spontaneous DNA opening of the U1 promoter upon PIC binding. In summary, these results  
224 suggest that DNA opening of snRNA gene promoters and the spontaneously melted protein-  
225 coding genes rely on easily melting regions around the TSS and use similar mechanisms.

226

### 227 **Definition of the transcription start site**

228 We observe 19 nucleotides of the DNA template strand spanning from the TBP-binding site to  
229 the upstream edge of the DNA bubble (at position -12). The templating nucleotide in open  
230 promoter DNA reaches the active site of Pol II ~30 nucleotides downstream of the upstream  
231 edge of the TBP-binding site (**Figures 6a, b**). The DNA strands forming the open DNA bubble  
232 are mobile, leading to a weakly resolved map. Subsequently, 12 nucleotides further  
233 downstream, we observe T +1 of the template strand immediately downstream of the catalytic  
234 Mg<sup>2+</sup> ion at the active site. This posits residue G -1 as the template for RNA synthesis. The CA  
235 dinucleotide is the signature of the Initiator sequence (Inr)<sup>33</sup> and is located at register -1 and +1  
236 of the non-template strand. This observation suggests that the TSS position is defined by a fixed  
237 distance from the site of TBP binding, as is known for protein-coding human genes that have  
238 their TSS within a window of 28-33 bp downstream of the TATA box<sup>34</sup>. Since we also observe  
239 a fixed position of SNAPc with respect to TBP, the TSS is apparently set by a fixed distance  
240 from the PSE in snRNA promoters.

241 These observations suggest that Pol II transcription would initiate from a TSS that is  
242 rather precise *in vivo*. To investigate this, we identified the main TSSs and determined their  
243 ‘TSS precision scores’ from a reanalysis of 5’- capped RNA sequencing data<sup>35</sup> for both mRNA  
244 and snRNA encoding genes with a constitutive first or a single exon (Methods). A maximum  
245 precision score of 1 means that all transcripts initiate at the main TSS ( $\pm 2$  bp). Indeed we find  
246 that Pol II snRNA transcription generally initiates in this narrow, 5-bp window with a high  
247 median precision score of 0.86, as exemplified by the *RNVUI-15* promoter (**Figure 6c**). In  
248 contrast, Pol II initiates transcription less precisely at TATA-less mRNA promoters, as shown  
249 by a median precision score of 0.36, as exemplified by the *HATI* promoter. Pol II also initiates  
250 mRNA transcription more precisely when promoter DNA contains a TATA box motif, with a  
251 median precision score of 0.71, as exemplified by the *TUBB4B* promoter (**Figure 6c**). These  
252 large differences in TSS precision are also observed in genome browser views of representative  
253 promoters (**Figure 6d**). The observed high TSS precision of snRNA promoters is consistent  
254 with our model that SNAPc defines TSS position. In summary, SNAPc binding to the PSE  
255 likely serves as a ruler for positioning of TBP at TATA-less snRNA promoters, leading to  
256 initiation at a defined distance downstream of the PSE.

257

### 258 **DISCUSSION**

259 Here we report structures of SNAPc-containing Pol II PICs on two different snRNA gene  
260 promoters and in two different states, the CC and OC states. Together with biochemical results  
261 and published literature, our structures suggest the mechanism of SNAPc-mediated snRNA  
262 transcription initiation by Pol II (**Figure 7**). SNAPc uses its conserved core to recognize the  
263 PSE motif in snRNA promoters, whereas its two wings position TFIIA and TFIIB. Since TFIIA  
264 and TFIIB form a rigid complex with TBP, SNAPc can indirectly position TBP at a defined  
265 location on snRNA promoters despite the absence of a consensus TATA box motif. This is  
266 consistent with the evidence that TFIIB-TBP complexes can be effectively recruited to snRNA  
267 promoters exclusively as part of a ternary TFIIA-TFIIB-TBP complex<sup>18</sup>. Positioning of the

## Rengachari et al.: Structure of SNAPc-containing Pol II PIC

268 TFIIA-TFIIB-TBP complex on promoter DNA in turn recruits the Pol II-TFIIF complex to the  
269 IMR of the promoter. The low DNA duplex stability at the IMR enables spontaneous DNA  
270 opening and occurs with the use of binding energy independent of TFIIE and TFIIH. The  
271 emerging DNA template strand then binds in the Pol II active center cleft and RNA chain  
272 synthesis is initiated at an Inr dinucleotide CA<sup>33</sup>, thereby setting the TSS at a defined distance  
273 from the PSE.

274 Comparison of our results with published data also provides insights into the evolution  
275 of the three different eukaryotic transcription systems. A distinguishing feature of transcription  
276 initiation by Pol II, with respect to Pol I and Pol III, is that the latter two machineries can open  
277 promoter DNA spontaneously<sup>36-40</sup>, whereas the Pol II machinery generally requires the help of  
278 an ATP-dependent translocase subunit in TFIIH and its accessory factor TFIIE<sup>22,41</sup>. However,  
279 we show here that on snRNA promoters, mammalian Pol II, together with the factors that form  
280 the core PIC, can open DNA spontaneously without the help of TFIIE and TFIIH. Such  
281 spontaneous DNA opening has also been observed for yeast Pol II at a subset of promoters<sup>31</sup>  
282 and also in the related archaeal transcription system<sup>42</sup>. Whereas spontaneous DNA opening  
283 occurs in the upstream-to-downstream direction, TFIIH-assisted DNA opening occurs in the  
284 downstream-to-upstream direction<sup>22,41</sup>. Our work thus provides evidence that, depending on the  
285 promoter, Pol II can use both types of DNA opening mechanisms, and suggests that TFIIH-  
286 assisted DNA opening originated later in the evolution of cellular DNA-dependent RNA  
287 polymerase machineries.

288 Several open questions remain to be addressed for a better understanding of snRNA  
289 gene transcription. In particular, SNAPc has been identified to be regulated by its direct  
290 interaction with activators that localize ~200 bp upstream of the PSE at the so-called distal  
291 sequence element (DSE)<sup>7</sup>. The intervening genomic region between PSE and DSE may be  
292 decorated by a nucleosome<sup>8</sup>. In the future, our work may be expanded to studying how DSE  
293 binding activators interact with the SNAPc-containing Pol II PIC described here, and how a  
294 nucleosome may enable or modulate this interaction. Additionally, our work also serves as  
295 stepping stone towards addressing the function of SNAPc in U6 snRNA transcription by Pol  
296 III. Such work should provide insights into how SNAPc can interact with both, the Pol II and  
297 the Pol III initiation machineries, providing further insights into the evolution of eukaryotic  
298 transcription systems.

299

## 300 **ONLINE METHODS**

### 301 **Cloning and protein expression**

302 cDNA constructs of SNAPc-FL containing SNAPC4 with an N-terminal StrepTwin-tag and a  
303 C-terminal His-tag, SNAPC1, SNAPC2, SNAPC3 and SNAPC5 were subcloned into the pLIB  
304 vector. The genes were assembled into a pBIG2ab vector using the biGBac system<sup>43</sup>. The  
305 cloned construct was transformed into DH10 EMBacY cells to generate bacmids. Next, the  
306 purified bacmid was mixed with Celfectin<sup>TM</sup> II reagent (Thermo Fisher Scientific) and  
307 transfected into 2 ml (density: 0.5 million cells/ml) of adherent Sf9 cells in a 6 well plate. After  
308 incubating the plate at 27 °C for 72 h, the resulting supernatant (P1 virus) was collected. To  
309 amplify the viral stock, 2 ml of P1 virus was added to 25 ml of Sf9 cells (0.5 million cells/ml)  
310 and incubated at 27 °C with shaking at 130 rpm. The supernatant (P2 virus) was collected after  
311 4-5 days of infection when the cell viability dropped to <85% and stored at 4 °C. Large scale  
312 protein expression was carried out using 3 x 400 ml of High5 cells (0.5 million cells/ml) by  
313 adding 2 ml of P2 virus in each flask and incubated at 27 °C for 4 days at 130 rpm. Cells were  
314 then harvested by centrifugation at 250 x g for 10 mins at 4 °C, and pellets were stored at -80  
315 °C. SNAPc-core (SNAPC4 1-516 and lack of the SNAPC2 subunit) was expressed as  
316 previously described<sup>18</sup>.

317

### 318 **Protein purification**

319 The insect cells pellet of SNAPc-FL were resuspended in buffer A containing 50 mM HEPES  
320 pH 7.8, 750 mM NaCl, 10% glycerol, 15 mM imidazole, 10 mM β-mercaptoethanol, 2 mM  
321 MgCl<sub>2</sub>, 1 mM phenylmethylsulfonyl fluoride (PMSF), 1 μg/mL Aprotinin, 1 μg/mL Pepstatin,  
322 and 1 μg/mL Leupeptin, supplemented with four EDTA-free protease inhibitor tablets (Pierce),  
323 a scoop of DNase I, and 10 μl benzonase. Lysis was performed using a dounce homogeniser  
324 followed by sonication and the lysate was clarified by centrifugation at 48,000 x g at 4 °C for  
325 40 mins. The supernatant was filtered using a 0.45-μm filter, and applied onto a HisTrap HP 5  
326 ml column (GE Healthcare), pre-equilibrated with buffer A. The column was washed with 10  
327 CV of buffer A1 (50 mM HEPES pH 7.8, 500 mM NaCl, 10% glycerol, 50 mM imidazole, 10  
328 mM β-mercaptoethanol, 0.5 mM PMSF and 10 mM O-Phospho-L-serine), and then with 5 CV  
329 of buffer A2 (50 mM HEPES pH 7.8, 1250 mM NaCl, 10% glycerol, 50 mM imidazole, 10 mM  
330 β-mercaptoethanol, and 0.5 mM PMSF). The column was again washed with 5 CV buffer A1,  
331 and the bound protein complex was eluted in buffer B (50 mM HEPES pH 7.8, 500 mM NaCl,  
332 10% glycerol, 300 mM imidazole, 10 mM β-mercaptoethanol, and 0.5 mM PMSF). Next, the  
333 sample was diluted to 250 mM NaCl with buffer Heparin A (50 mM HEPES pH 7.8, 10%  
334 glycerol, 1 mM TCEP, and 0.1 mM PMSF). The sample was centrifuged at 13,000 rpm for 15  
335 mins at 4 °C and loaded onto a HiTrap Heparin HP 5 ml column (GE healthcare), pre-  
336 equilibrated with 12.5% of buffer Heparin B (50 mM HEPES pH 8, 2 M NaCl, 10% glycerol,  
337 1 mM TCEP, and 0.1 mM PMSF). After washing with 5 CV of 12.5% buffer Heparin B, elution  
338 was performed through a linear gradient from 15% to 60% over 10 CV. The eluted fractions  
339 were analysed by SDS-PAGE, and fractions containing the SNAPc-FL complex were pooled,  
340 and concentrated using a 100 kDa molecular weight cut-off (MWCO) VivaSpin concentrator  
341 (Sartorius). The sample was centrifuged at 13,000 rpm for 15 mins at 4 °C and applied onto a  
342 Superose 6 PG XK 16/70 column (GE Healthcare), pre-equilibrated with 50 mM HEPES pH



## Rengachari et al.: Structure of SNAPc-containing Pol II PIC

343 7.8, 250 mM KCl, 10% glycerol, and 1 mM TCEP. Peak fractions were pooled, concentrated,  
344 flash-frozen and stored at -80 °C.

345 SNAPc-core has been purified as previously described<sup>18</sup> with some modifications. Briefly,  
346 after cell lysis and centrifugation, the supernatant was subjected to nickel column purification  
347 (GE Healthcare) and eluted with 300 mM imidazole. The elution was then further purified with  
348 an heparin column and eluted with a gradient from 250mM to 1.25M NaCl. The fractions of  
349 interest were pooled, concentrated and subjected to size exclusion chromatography with a S200  
350 16/600 equilibrated with 100 mM NaCl, 50 mM HEPES pH 7.9, 10% glycerol and 1mM TCEP.  
351 *S. scrofa* Pol II and human initiation factors TBP, TFIIA, TFIIB, TFIIE, TFIIF and TFIIH were  
352 purified as previously described<sup>22</sup>.

353

### 354 Electrophoretic Mobility Shift Assays

355 EMSA was performed using a 76 bp fragment of U1 promoter DNA (template:5'-GAA ACG  
356 TTG TGC CTC TGC CCC GAC ACA GCC TCA TAC GCC TCA CTC TTT ACA CAC ACG  
357 GTC ACT TG CCC CGC GCA CT-3' and its complementary strand) and a 75 bp fragment of  
358 U5 promoter DNA (template:5'-ACC AGT TAC TTC TGT AAC TCA ATT TTC GGG TAA  
359 CTG CAA TTC CTA GTA CAC TGA TGG TGT CTA CTA ATC CC AAG G-3' and its  
360 complementary strand; Integrated DNA Technologies). 20 pM of SNAPc FL or core were  
361 incubated with 5 pM of annealed oligonucleotides in presence or absence of 25 pM of TFIIB  
362 and TBP in 20 µL of incubation buffer (250 mM NaCl, 50 mM HEPES pH 7.9, 20% glycerol,  
363 1 mM TCEP) at room temperature for 15 min. The complexes were resolved on 5%  
364 polyacrylamide (37.5:1 acrylamide/bisacrylamide, 10% glycerol, Tris Borate EDTA 1x) gels  
365 in 0.5X Tris Borate EDTA running buffer at 40 mA. After staining with Ethidium bromide, the  
366 gels were scanned with a Typhoon FLA9500 (GE Healthcare).

367

### 368 Promoter-dependent *in vitro* transcription assay

369 *In vitro* transcription assays were performed as described previously<sup>22,41</sup> with minor alterations.  
370 The DNA scaffold (dsDNA) was prepared as reported using a pUC119 vector into which a 92  
371 nucleotide fragment of the native U1 snRNA promoter<sup>20</sup> had been inserted. The scaffold (non-  
372 template: 5'-GGG CGT GAC CGT GTG TGT AAA GAG TGA GGC GTA TGA GGC TGT  
373 GTC GGG GCA GAG GCA CAA CGT TTC GCC CGA AGA TCT CAT ACT TAC CTG  
374 GCA GGG CTA AGC TTG GCG TAA TCA TGG TCA TAG CTG TTT CCT GTG TGA AAT  
375 TGT TAT CCG CTC ACA ATT CCG CCC-3', template: 5'-GGG CGG AAT TGT GAG CGG  
376 ATA ACA ATT TCA CAC AGG AAA CAG CTA TGA CCA TGA TTA CGC CAA GCT  
377 TAG CCC TGC CAG GTA AGT ATG AGA TCT TCG GGC GAA ACG TTG TGC CTC  
378 TGC CCC GAC ACA GCC TCA TAC GCC TCA CTC TTT ACA CAC ACG GTC ACG  
379 CCC-3') was stored in low salt buffer (60 mM KCl, 10 mM K-HEPES pH 7.5, 8 mM MgCl<sub>2</sub>,  
380 3% (v/v) glycerol).

381 Initiation complexes for *in vitro* transcription were reconstituted on scaffold DNA  
382 essentially as described<sup>22,41</sup>. All incubation steps were performed at 25 °C unless indicated  
383 otherwise. Per sample, 1.6 pmol scaffold, 1.8 pmol Pol II, TFIIE and TFIIH, 5 pmol TBP and  
384 TFIIB, 9 pmol TFIIF and TFIIA and 5 pmol SNAPc-FL or SNAPc-core were used. SNAPc  
385 was mixed and added to the sample simultaneously with TFIIB. Reactions were prepared in a  
386 sample volume of 23.8 µl with final assay conditions of 60 mM KCl, 3 mM K-HEPES pH 7.9,  
387 20 mM Tris-HCl pH 7.9, 8 mM MgCl<sub>2</sub>, 2% (w/v) PVA, 3% (v/v) glycerol, 0.5 mM 1,4-

## Rengachari et al.: Structure of SNAPc-containing Pol II PIC

388 dithiothreitol, 0.5 mg ml<sup>-1</sup> BSA and 20 units RNase inhibitor. To achieve complete PIC  
389 formation, samples were incubated for 45 min at 30 °C. Transcription was started by adding  
390 1.2 µl of 10 mM NTP solution and permitted to proceed for 60 min at 30 °C. Reactions were  
391 quenched with 100 µl Stop buffer (300 mM NaCl, 10 mM Tris-HCl pH 7.5, 0.5 mM EDTA)  
392 and 14 µl 10% SDS, followed by treatment with 4 µg proteinase K (New England Biolabs) for  
393 30 min at 37 °C. RNA products were isolated from the samples as described<sup>41</sup>, applied to urea  
394 gels (7 M urea, 1x TBE, 6% acrylamide:bis-acrylamide 19:1) and separated by denaturing gel  
395 electrophoresis (urea-PAGE) in 1x TBE buffer for 45 minutes at 180 volts. Gels were stained  
396 for 30 min with SYBR™ Gold (Thermo Fisher Scientific) and RNA was visualized with a  
397 Typhoon 9500 FLA imager (GE Healthcare Life Sciences).

398

### 399 **Preparation of the SNAPc-containing Pol II PIC**

400 We performed the assembly of SNAPc containing Pol II PIC on snRNA promoters at 25°C  
401 essentially as described previously. We used a 96bp fragment of both the native U1 promoter  
402 DNA(template:5'-ATC ATG GTA TCT CCC CTG CCA GGT AAG TAT GAA ACG TTG  
403 TGC CTC TGC CCC GAC ACA GCC TCA TAC GCC TCA CTC TTT ACA CAC ACGGTC  
404 ACT TGC-3';non-template: 5'-GCA AGT GAC CGT GTG TGT AAA GAG TGA GGC GTA  
405 TGA GGC TGT GTC GGG GCA GAG GCA CAA CGT TTC ATA CTT ACC TGG CAG  
406 GGG AGA TAC CAT GAT-3') and an engineered U5 promoter with 10bp deleted from the  
407 downstream edge of the PSE sequence (template: 5'- CCC TGC CAG GTT TTA TGC GAT  
408 CTG AAG AGA AAC CAG AGT ATA CCA GTT ACT TCT GTA ACT CAA TTT TCG  
409 GGT CCTAGT ACA CTG ATG GTG TCT ACT-3'; non-template: 5'- AGT AGA CAC CAT  
410 CAG TGT ACT AGG ACC CGA AAA TTG AGT TAC AGA AGT AAC TGG TAT ACT  
411 CTG GTT TCT CTT CAG ATC GCA TAA AAC CTG GCA GGG- 3'). In summary, SNAPc  
412 (FL or Core) was pre-incubated for 5 min with the snRNA promoter (U1 or U5) scaffold. It was  
413 then mixed with TFIIA-TFIIB and TBP followed by the pre-formed Pol II-TFIIF complex.  
414 TFIIE was then added to this mixture and the assembly was incubated at 25°C for 60 min at  
415 300 rpm. This reconstituted SNAPc containing Pol II PIC was subjected to 10-30% sucrose-  
416 gradient ultra-centrifugation with simultaneous cross-linking using GraFix (Kastner et al.,  
417 2008) at 175,000g for 16h at 4°C. The assay was then fractionated as 200µl aliquots where the  
418 crosslinking reaction was quenched using a cocktail of 10mM aspartate and 30mM lysine for  
419 10mins. Fractions with SNAPc containing Pol II PIC were dialysed against the cryo-EM sample  
420 buffer (25 mM HEPES pH 7.6, 100 mM KCl, 5 mM MgCl<sub>2</sub>, 1% glycerol and 3 mM TCEP).

421

### 422 **Cryo-EM data collection and processing**

423 Samples for cryo-EM were prepared using Quantifoil R3.5/1 holey carbon grids pre-coated  
424 with a homemade 3 nm continuous carbon. Four microlitres of SNAPc containing Pol II PIC  
425 sample bound to snRNA promoter (U1/U5) was added to the carbon side and incubated for 2.5  
426 min. The grids were blotted for 2.5 s and vitrified by plunging into liquid ethane with a Vitrobot  
427 Mark IV (FEI Company) set at 4 °C and 100% humidity. Cryo-EM data were collected on a  
428 300-kV FEI Titan Krios with a K3 summit direct detector (Gatan) and a GIF quantum energy  
429 filter (Gatan) operated with a slit width of 20 eV. Automated data collection was performed  
430 with SerialEM at a nominal magnification of 81,000x, corresponding to a pixel size of 1.05  
431 Å/pixel<sup>44</sup>. For the sample containing U1 promoter, a total of 16,854 image stacks, with each

## Rengachari et al.: Structure of SNAPc-containing Pol II PIC

432 stack containing 50 frames, were collected at a defocus range of  $-0.5$  to  $-3.0$   $\mu\text{m}$ . All movie  
433 frames were contrast transfer function (CTF)-estimated, motion-corrected and dose-weighted  
434 using Warp<sup>45</sup>. Particles were picked by Warp using a trained neural network, resulting in  
435 5,181,947 particles as a starting set. Subsequent steps of image processing were performed with  
436 cryoSPARC<sup>46</sup> and RELION v.3.1.0<sup>47</sup>.

437 Particles were extracted with a binning factor of 2 and a box size of 200 pixels (a pixel  
438 size of  $2.1$   $\text{\AA}/\text{pixel}$ ) to perform initial clean-up and sorting. The processing scheme was centered  
439 around identifying the best SNAPc-containing particle sets. Iterative rounds of 2D-  
440 classification followed by heterogenous and homogenous refinements in cryoSPARC, led to  
441 two sets of particles corresponding to CC (set-1: 252,067 particles) and OC (set-2: 240,243  
442 particles) promoter states respectively. Each set was re-extracted without binning and processed  
443 using RELION v.3.1.0, as follows. For set-1, the particles were further sorted by focused 3D  
444 classification with a large spherical mask (Mask-1) encompassing the upstream region of PIC  
445 containing SNAPc, TBP, TFIIA and TFIIB. This resulted in identifying the best 47,293  
446 SNAPc-containing particles. These particles were again subjected to 3D refinement using  
447 Mask-1, giving rise to a reconstruction of SNAPc containing Pol II PIC bound to U1 promoter  
448 in CC state at  $3.4$   $\text{\AA}$  resolution (map-1). In parallel, focused 3D classification of set-2 with a  
449 spherical mask (Mask-2) around the upstream region helped to identify the best 137,246 SNAPc  
450 containing particles. These particles were then subjected to 3D refinement followed by CTF  
451 refinement and Bayesian polishing. Following this, the particles were subject to refinement  
452 with and without mask-1 to obtain of SNAPc containing Pol II PIC bound to U1 promoter in  
453 OC state at  $3.0$   $\text{\AA}$  (map-2) and a local map spanning the SNAPc containing upstream region at  
454  $3.7$   $\text{\AA}$  resolution(map-3).

455 For the sample containing U5 promoter dataset, 4,842 image stacks, with each stack  
456 containing 60 frames, were collected at a defocus range of  $-0.3$  to  $-2.5$   $\mu\text{m}$ . All movie frames  
457 were contrast transfer function (CTF)-estimated, motion-corrected and dose-weighted using  
458 Warp<sup>45</sup>. Particles were picked by Warp using a trained neural network, resulting in 1,299,523  
459 particles. Subsequent steps of image processing were performed with cryoSPARC<sup>46</sup> and  
460 RELION v.3.1.0<sup>47</sup>. Particles were extracted with a binning factor of 4 and a box size of 100  
461 pixels (a pixel size of  $4.2$   $\text{\AA}/\text{pixel}$ ) to perform initial clean-up and sorting. After sorting in  
462 cryoSPARC using 2D-classification followed by heterogenous and homogenous refinements,  
463 a particle set (set-3: 443,960 particles) in CC promoter state was re-extracted with 2x binning  
464 (a pixel size of  $2.1$   $\text{\AA}/\text{pixel}$ ) and processed using RELION v.3.1.0, as follows. For set-3, the  
465 particles were further sorted by 3D classification followed by focused 3D classification using  
466 Mask-1. The resulting 159,144 particles were re-extracted without a binning factor and were  
467 subjected to CTF refinement and Bayesian polishing. These particles were then subjected to  
468 another round of masked classification yielding 85,787 SNAPc-containing particles. These  
469 particles were then 3D refined without and with Mask-1, giving rise to a reconstruction of  
470 SNAPc containing Pol II PIC bound to U5 promoter in CC state at  $3.0$   $\text{\AA}$  resolution (map-4)  
471 and a local map of the SNAPc containing upstream complex extending to  $3.2$   $\text{\AA}$ (map-5).

472 The reported resolutions were calculated on the basis of the gold standard Fourier shell  
473 correlation (FSC) 0.143 criterion. After processing of the final reconstructions, B-factor  
474 sharpening was performed for all final maps on the basis of automatic B-factor determination  
475 in RELION ( $-5$   $\text{\AA}^2$  for map-1: SNAPc-PIC bound to U1 promoter in CC state,  $-10$   $\text{\AA}^2$  for map-  
476 2: SNAPc-PIC bound to U1 promoter in OC state and  $-10$   $\text{\AA}^2$  for map-3: local map of SNAPc

## Rengachari et al.: Structure of SNAPc-containing Pol II PIC

477 containing upstream complex,  $-10 \text{ \AA}^2$  for map-4: SNAPc-PIC bound to U5 promoter in CC state  
478 and  $-10 \text{ \AA}^2$  for map-5: local map of SNAPc containing upstream complex). Estimates of local  
479 resolution were calculated using the in-built local-resolution tool of RELION and the estimated  
480 B-factors. To assist model building, a local-resolution-filtered map (but unsharpened) of map-  
481 5 was sharpened locally using PHENIX.auto\_sharpen<sup>48</sup>.

482

### 483 **Model building and refinement**

484 The PIC was modelled using the core PIC part of the previously published high resolution  
485 structures in closed and open promoter states<sup>22</sup>. For SNAPc, the subunits SNAPC1 and  
486 SNAPC4 were built using partial homology models generated using TrRosetta<sup>49</sup>. The partial  
487 models were rigid body fitted into the density using UCSF Chimera<sup>50</sup> and were manually  
488 extended and corrected using Coot<sup>51</sup> to fit the density. The subunit SNAPC3 was modelled  
489 entirely de novo using the experimental density in Coot. Ambiguous density corresponding to  
490 linker regions were not modelled. The model corresponding to the wing-2 region constituting  
491 parts of SNAPC1, SNAPC3 and SNAPC4 was modelled using AlphaFold<sup>27</sup>. The model for  
492 promoter DNA in CC and OC states was obtained using the high-resolution structures of human  
493 PIC as template where in the sequence register was mutated to fit the U1 and U5 respectively.  
494 The models were then subjected to iterative rounds of PHENIX real-space refinement followed  
495 by manual adjustment in Coot to achieve final models with good stereochemistry as assessed  
496 by MolProbity<sup>52</sup>. Figures representing the 3D structures and maps were prepared using PyMOL,  
497 UCSF Chimera and UCSF ChimeraX.

498

### 499 **Crosslinking mass-spectrometry**

500 To prepare a sample for performing crosslinking mass-spectrometry, a stable complex of  
501 SNAPc-containing Pol-II PIC bound to U5 promoter was isolated. An assay containing Pol II,  
502 TBP, TFIIA, TFIIB, TFIIF and SNAPc-FL was incubated in ratios explained above and was  
503 subjected to size-exclusion chromatography using Superose 6 increase 3.2/300 GL column (GE  
504 Healthcare) pre-equilibrated with buffer-x (25mM Hepes pH 7.5, 100mM NaCl, 5mM MgCl<sub>2</sub>,  
505 5% glycerol and 2mM TCEP). The peak fractions were then pooled and incubated with 1mM  
506 of Bissulfosuccinimidyl suberate (BS3) for 45 min at 4° C. The crosslinking reaction was  
507 quenched using a cocktail of 10 mM aspartate and 30 mM lysine.

508 Crosslinked proteins were resuspended in 4 M urea/ 50 mM ammonium bicarbonate for  
509 10 min at 25°C and reduced for 30 min at RT with 10 mM dithiothreitol (DTT). Proteins were  
510 alkylated for 30 min at RT in the dark by adding iodacetamide (IAA) to a final concentration  
511 of 55 mM. Sample was diluted to 1M Urea and digested for 30 min at 37 °C with 4 µl Pierce  
512 Universal Nuclease (250 U/µl) in the presence of 2 mM MgCl<sub>2</sub>. Trypsin (Promega) digest was  
513 performed o/n at 37 °C in a 1:50 enzyme/protein ratio, the reaction was terminated with 0.2 %  
514 (v/v) FA. Tryptic peptides were desalted on MicroSpin Columns (Harvard Apparatus)  
515 following manufacturer's instruction and vacuum-dried. Cross-linked peptides were  
516 resuspended in 50 µl 30 % acetonitrile/0.1 % TFA and enriched by peptide size exclusion  
517 chromatography/pSEC (Superdex Peptide PC3.2/300 column, GE Healthcare, flow rate 50  
518 µl/min).

519 Crosslinked peptides derived from pSEC were subjected to liquid chromatography mass  
520 spectrometry (LC-MS) on a Thermo Orbitrap Exploris mass spectrometer. Peptides were loaded  
521 in duplicates onto a Dionex Ultimate 3000 RSLCnano equipped with a custom column



## Rengachari et al.: Structure of SNAPc-containing Pol II PIC

522 (ReproSil-Pur 120 C18-AQ, 1.9  $\mu\text{m}$  pore size, 75  $\mu\text{m}$  inner diameter, 30 cm length, Dr. Maisch  
523 GmbH). Peptides were separated applying the following gradient: mobile phase A consisted of  
524 0.1 % formic acid (FA, v/v), mobile phase B of 80 % ACN/0.08 % FA (v/v). The gradient  
525 started at 5 % B, increasing to 10, 15 or 20 % B within 3 min, followed by a continuous increase  
526 to 48 % B within 45 min, then keeping B constant at 90 % for 8 min. After each gradient, the  
527 column was again equilibrated to 5 % B for 2 min. The flow rate was set to 300 nL/min.

528 MS1 spectra were acquired with a resolution of 120,000 in the orbitrap (OT) covering  
529 a mass range of 380–1600 m/z. Dynamic exclusion was set to 30 s. Only precursors with a  
530 charge state of 3-8 were included. MS2 spectra were recorded with a resolution of 30,000 in  
531 OT and the isolation window to 1.6 m/z. Fragmentation was enforced by higher-energy  
532 collisional dissociation (HCD) at 30 %. Raw files were searched against a database containing  
533 the sequences of the proteins of the complex and analyzed via pLink 2.3.9 at a false discovery  
534 rate (FDR) of 1%<sup>53</sup>. Carbamidomethylation of cysteines was set as fixed modification,  
535 oxidation of methionines as variable modification. The database contained all proteins within  
536 the complex. For further analysis only interaction sites with 3 cross-linked peptide spectrum  
537 matches were taken into account. Cross-links were displayed with xiNET and XlinkAnalyzer  
538 in UCSF Chimera.<sup>50,54,55</sup>

539

### 540 **TSS precision analyses in cells**

541 We utilized published 5'cap-seq data<sup>35</sup> (GEO: GSE159633) for analyses of TSS precision in  
542 cells. The raw data were processed as described previously<sup>35</sup> to obtain the 5'-ends of reads and  
543 generate normalized coverage. In brief, we first removed the unique molecular identifier (UMI)  
544 from 5cap-seq reads with UMI-tools<sup>56</sup> and then trimmed adapter sequences with Cutadapt<sup>57</sup>  
545 and mapped to the human genome (GRCh38) merged with the *D. melanogaster* genome (Dm6)  
546 with the STAR mapper<sup>58</sup>. We next deduplicated the mapped data with UMI-tools to remove  
547 any PCR duplicates and then determined the first transcribed base and used this position in  
548 downstream analyses. Normalization factors were obtained from the spike-in reads (processed  
549 as above) that mapped to the spike-in genome and used to normalize the human genome  
550 coverage profiles. The replicates were combined by summing the normalized coverage per nt.  
551 Thus, obtaining genome-wide capped 5'-end signal (5'cap-seq signal) at single-base resolution.  
552 We subset the NCBI reference genome annotation<sup>59</sup> (GRCh38.p7) to only contain genes  
553 annotated to the primary assembly and included only genes with known transcripts (prefix:  
554 "NR" or "NM") and also excluded overlapping genes. To exclude genes with alternative start  
555 sites from downstream analyses we included only genes that have a constitutive first or a single  
556 exon in our downstream analyses.

557 To determine the main TSS we determined the position with the highest 5'cap-seq signal  
558 within constitutive first exons of the reference annotation. To accommodate for reference  
559 annotation imprecision, we also included 10 bp upstream of the annotated TSS and set the  
560 downstream cutoff to 500 bp downstream of the annotated TSS. We thus obtained the main  
561 TSS for each constitutive TSS. We next quantified the 5'cap-seq signal of the main TSS ( $\pm 2$   
562 bp) and the TSS region (main TSS  $\pm 50$  bp). We excluded genes with less than 10 counts in the  
563 TSS region and genes with biotypes that are not either protein-coding or snRNA. From the  
564 remaining annotated snRNA subset we also removed known Pol III-transcripts: RN7SK,  
565 RNU6ATAC, SNAR-G2, RNU6-2, SNAR-C4, SNAR-G1, SNAR-C3 and identified with  
566 protein-coding gene promoters contain a TATA-box motif (JASPAR database, 2020 release:

## Rengachari et al.: Structure of SNAPc-containing Pol II PIC

567 <https://jaspar2020.genereg.net/matrix/POL012.1/>) within 50 bp upstream of the annotated TSS.  
568 Finally, we determined the TSS precision score by dividing the TSS peak counts by the TSS  
569 region counts. The maximum TSS precision score is 1, which means that all 5' cap-seq signal  
570 is within the TSS peak. The preprocessed 5' cap-seq data was analyzed in RStudio<sup>60</sup> utilizing R  
571 version 3.6.1<sup>61</sup> and packages from the Bioconductor repository<sup>62,63</sup> and Tidyverse<sup>64</sup>. Plots were  
572 generated with ggplot2 and ggbio<sup>65</sup>.

573

### 574 **Acknowledgements**

575 We thank present and past members of the Cramer laboratory for help and discussions. We  
576 thank Frauke Grabbe for purifying TBP, TFIIA, TFIIB, TFIIE, TFIIF and TFIIH. We thank C.  
577 Dienemann and S. Schilbach for input towards designing the engineered U5 promoter DNA.  
578 We thank C. Dienemann and U. Steuerwald for maintenance of the electron microscopy facility.  
579 S.R. was supported by a postdoctoral fellowship from Peter und Traudl Engelhorn Foundation.  
580 A.V. was supported by the Cancer Research UK Programme Foundation (CR-UK  
581 C47547/A21536) and a Wellcome Trust Investigator Award (200818/Z/16/Z. P.C. was  
582 supported by the Deutsche Forschungsgemeinschaft (EXC 2067/1 39072994, SFB860) and the  
583 ERC Advanced Investigator Grant CHROMATRANS (grant agreement No. 882357).

584

### 585 **Author Contributions**

586 S.R. carried out all experiments and data analysis, unless stated otherwise. S.S. performed the  
587 *in vitro* transcription assay and quantification. T.K. and J.G. cloned, expressed and purified the  
588 SNAPc variants and performed EMSA assays. K.Z. performed the reanalysis of 5'-capseq data,  
589 TSS precision plots and the web-logo plots. J.S. performed crosslinking mass-spectrometry and  
590 data analysis and was supervised by H.U. S.R. and C.D. collected the cryo-EM datasets. P.C.  
591 and A.V. designed and supervised research. S.R. and P.C. interpreted the data and wrote the  
592 manuscript, with input from all authors.

593

### 594 **Competing interests**

595 The authors declare no competing interests.

596

597 **Supplementary Information** is available online at <https://doi.org/XYZ>.

598

599 **Correspondence** Correspondence and request of materials and resources should be addressed  
600 to P.C. ([patrick.cramer@mpinat.mpg.de](mailto:patrick.cramer@mpinat.mpg.de)).

601

### 602 **Data availability**

603 The cryo-EM density reconstructions were deposited to the EMDB under accession codes  
604 EMD-AAAA, -BBBB, -CCCC, -DDDD, -EEEE and atomic coordinates were deposited to the  
605 PDB under the accession codes PDB-AAAA, -BBBB, -CCCC, -DDDD, -EEEE. All data is  
606 available in the main text or the supplementary materials.

607 **References**

- 608
- 609 1 Greber, B. J. & Nogales, E. The Structures of Eukaryotic Transcription Pre-initiation  
610 Complexes and Their Functional Implications. *Subcell Biochem* **93**, 143-192,  
611 doi:10.1007/978-3-030-28151-9\_5 (2019).
- 612 2 Nogales, E., Louder, R. K. & He, Y. Structural Insights into the Eukaryotic Transcription  
613 Initiation Machinery. *Annu Rev Biophys* **46**, 59-83, doi:10.1146/annurev-biophys-  
614 070816-033751 (2017).
- 615 3 Osman, S. & Cramer, P. Structural Biology of RNA Polymerase II Transcription: 20  
616 Years On. *Annu Rev Cell Dev Biol* **36**, 1-34, doi:10.1146/annurev-cellbio-042020-  
617 021954 (2020).
- 618 4 Sainsbury, S., Bernecky, C. & Cramer, P. Structural basis of transcription initiation by  
619 RNA polymerase II. *Nat Rev Mol Cell Biol* **16**, 129-143, doi:10.1038/nrm3952 (2015).
- 620 5 Will, C. L. & Luhrmann, R. Spliceosome structure and function. *Cold Spring Harb*  
621 *Perspect Biol* **3**, doi:10.1101/cshperspect.a003707 (2011).
- 622 6 Egloff, S., O'Reilly, D. & Murphy, S. Expression of human snRNA genes from beginning  
623 to end. *Biochem Soc Trans* **36**, 590-594, doi:10.1042/BST0360590 (2008).
- 624 7 Dergai, O. & Hernandez, N. How to Recruit the Correct RNA Polymerase? Lessons  
625 from snRNA Genes. *Trends Genet* **35**, 457-469, doi:10.1016/j.tig.2019.04.001 (2019).
- 626 8 Guiro, J. & Murphy, S. Regulation of expression of human RNA polymerase II-  
627 transcribed snRNA genes. *Open Biol* **7**, doi:10.1098/rsob.170073 (2017).
- 628 9 Jawdekar, G. W. & Henry, R. W. Transcriptional regulation of human small nuclear  
629 RNA genes. *Biochim Biophys Acta* **1779**, 295-305, doi:10.1016/j.bbagr.2008.04.001  
630 (2008).
- 631 10 Mittal, V., Ma, B. & Hernandez, N. SNAP(c): a core promoter factor with a built-in  
632 DNA-binding damper that is deactivated by the Oct-1 POU domain. *Genes Dev* **13**,  
633 1807-1821, doi:10.1101/gad.13.14.1807 (1999).
- 634 11 Jawdekar, G. W. *et al.* The unorthodox SNAP50 zinc finger domain contributes to  
635 cooperative promoter recognition by human SNAPc. *J Biol Chem* **281**, 31050-31060,  
636 doi:10.1074/jbc.M603810200 (2006).
- 637 12 Wong, M. W. *et al.* The large subunit of basal transcription factor SNAPc is a Myb  
638 domain protein that interacts with Oct-1. *Mol Cell Biol* **18**, 368-377,  
639 doi:10.1128/mcb.18.1.368 (1998).
- 640 13 Das, A. & Bellofatto, V. RNA polymerase II-dependent transcription in trypanosomes  
641 is associated with a SNAP complex-like transcription factor. *Proc Natl Acad Sci U S A*  
642 **100**, 80-85, doi:10.1073/pnas.262609399 (2003).
- 643 14 Su, Y. *et al.* Characterization of a Drosophila proximal-sequence-element-binding  
644 protein involved in transcription of small nuclear RNA genes. *Eur J Biochem* **248**, 231-  
645 237, doi:10.1111/j.1432-1033.1997.t01-1-00231.x (1997).
- 646 15 Henry, R. W., Mittal, V., Ma, B., Kobayashi, R. & Hernandez, N. SNAP19 mediates the  
647 assembly of a functional core promoter complex (SNAPc) shared by RNA polymerases  
648 II and III. *Genes Dev* **12**, 2664-2672, doi:10.1101/gad.12.17.2664 (1998).
- 649 16 Ma, B. & Hernandez, N. A map of protein-protein contacts within the small nuclear  
650 RNA-activating protein complex SNAPc. *J Biol Chem* **276**, 5027-5035,  
651 doi:10.1074/jbc.M009301200 (2001).
- 652 17 Kuhlman, T. C., Cho, H., Reinberg, D. & Hernandez, N. The general transcription  
653 factors IIA, IIB, IIF, and IIE are required for RNA polymerase II transcription from the

Rengachari et al.: Structure of SNAPc-containing Pol II PIC

- 654 human U1 small nuclear RNA promoter. *Mol Cell Biol* **19**, 2130-2141,  
655 doi:10.1128/MCB.19.3.2130 (1999).
- 656 18 Dergai, O. *et al.* Mechanism of selective recruitment of RNA polymerases II and III to  
657 snRNA gene promoters. *Genes Dev* **32**, 711-722, doi:10.1101/gad.314245.118 (2018).
- 658 19 Compe, E. & Egly, J. M. Nucleotide Excision Repair and Transcriptional Regulation:  
659 TFIIH and Beyond. *Annu Rev Biochem* **85**, 265-290, doi:10.1146/annurev-biochem-  
660 060815-014857 (2016).
- 661 20 James Faresse, N. *et al.* Genomic study of RNA polymerase II and III SNAPc-bound  
662 promoters reveals a gene transcribed by both enzymes and a broad use of common  
663 activators. *PLoS Genet* **8**, e1003028, doi:10.1371/journal.pgen.1003028 (2012).
- 664 21 Kastner, B. *et al.* GraFix: sample preparation for single-particle electron  
665 cryomicroscopy. *Nat Methods* **5**, 53-55, doi:10.1038/nmeth1139 (2008).
- 666 22 Aibara, S., Schilbach, S. & Cramer, P. Structures of mammalian RNA polymerase II  
667 pre-initiation complexes. *Nature* **594**, 124-128, doi:10.1038/s41586-021-03554-8  
668 (2021).
- 669 23 Kim, J. L., Nikolov, D. B. & Burley, S. K. Co-crystal structure of TBP recognizing the  
670 minor groove of a TATA element. *Nature* **365**, 520-527, doi:10.1038/365520a0  
671 (1993).
- 672 24 Tan, S., Hunziker, Y., Sargent, D. F. & Richmond, T. J. Crystal structure of a yeast  
673 TFIIA/TBP/DNA complex. *Nature* **381**, 127-151, doi:10.1038/381127a0 (1996).
- 674 25 Archuleta, T. L. *et al.* Structure and evolution of ENTH and VHS/ENTH-like domains in  
675 tepsin. *Traffic* **18**, 590-603, doi:10.1111/tra.12499 (2017).
- 676 26 Hung, K. H. & Stumph, W. E. Regulation of snRNA gene expression by the *Drosophila*  
677 melanogaster small nuclear RNA activating protein complex (DmSNAPc). *Crit Rev*  
678 *Biochem Mol Biol* **46**, 11-26, doi:10.3109/10409238.2010.518136 (2011).
- 679 27 Jumper, J. *et al.* Highly accurate protein structure prediction with AlphaFold. *Nature*  
680 **596**, 583-589, doi:10.1038/s41586-021-03819-2 (2021).
- 681 28 Hinkley, C. S., Hirsch, H. A., Gu, L., LaMere, B. & Henry, R. W. The small nuclear RNA-  
682 activating protein 190 Myb DNA binding domain stimulates TATA box-binding  
683 protein-TATA box recognition. *J Biol Chem* **278**, 18649-18657,  
684 doi:10.1074/jbc.M204247200 (2003).
- 685 29 Lu, X. J., Shakked, Z. & Olson, W. K. A-form conformational motifs in ligand-bound  
686 DNA structures. *J Mol Biol* **300**, 819-840, doi:10.1006/jmbi.2000.3690 (2000).
- 687 30 Patel, A. B. *et al.* Structure of human TFIIID and mechanism of TBP loading onto  
688 promoter DNA. *Science* **362**, doi:10.1126/science.aau8872 (2018).
- 689 31 Dienemann, C., Schwalb, B., Schilbach, S. & Cramer, P. Promoter Distortion and  
690 Opening in the RNA Polymerase II Cleft. *Mol Cell* **73**, 97-106 e104,  
691 doi:10.1016/j.molcel.2018.10.014 (2019).
- 692 32 Holstege, F. C., Tantin, D., Carey, M., van der Vliet, P. C. & Timmers, H. T. The  
693 requirement for the basal transcription factor IIE is determined by the helical stability  
694 of promoter DNA. *EMBO J* **14**, 810-819 (1995).
- 695 33 Haberle, V. & Stark, A. Eukaryotic core promoters and the functional basis of  
696 transcription initiation. *Nat Rev Mol Cell Biol* **19**, 621-637, doi:10.1038/s41580-018-  
697 0028-8 (2018).
- 698 34 Wang, W., Carey, M. & Gralla, J. D. Polymerase II promoter activation: closed  
699 complex formation and ATP-driven start site opening. *Science* **255**, 450-453,  
700 doi:10.1126/science.1310361 (1992).



Rengachari et al.: Structure of SNAPc-containing Pol II PIC

- 701 35 Zumer, K. *et al.* Two distinct mechanisms of RNA polymerase II elongation  
702 stimulation in vivo. *Mol Cell* **81**, 3096-3109 e3098, doi:10.1016/j.molcel.2021.05.028  
703 (2021).
- 704 36 Abascal-Palacios, G., Ramsay, E. P., Beuron, F., Morris, E. & Vannini, A. Structural  
705 basis of RNA polymerase III transcription initiation. *Nature* **553**, 301-306,  
706 doi:10.1038/nature25441 (2018).
- 707 37 Han, Y., Yan, C., Fishbain, S., Ivanov, I. & He, Y. Structural visualization of RNA  
708 polymerase III transcription machineries. *Cell Discov* **4**, 40, doi:10.1038/s41421-018-  
709 0044-z (2018).
- 710 38 Pilsl, M. & Engel, C. Structural basis of RNA polymerase I pre-initiation complex  
711 formation and promoter melting. *Nat Commun* **11**, 1206, doi:10.1038/s41467-020-  
712 15052-y (2020).
- 713 39 Sadian, Y. *et al.* Molecular insight into RNA polymerase I promoter recognition and  
714 promoter melting. *Nat Commun* **10**, 5543, doi:10.1038/s41467-019-13510-w (2019).
- 715 40 Vorlander, M. K., Khatteer, H., Wetzler, R., Hagen, W. J. H. & Muller, C. W. Molecular  
716 mechanism of promoter opening by RNA polymerase III. *Nature* **553**, 295-300,  
717 doi:10.1038/nature25440 (2018).
- 718 41 Schilbach, S., Aibara, S., Dienemann, C., Grabbe, F. & Cramer, P. Structure of RNA  
719 polymerase II pre-initiation complex at 2.9 Å defines initial DNA opening. *Cell* **184**,  
720 4064-4072 e4028, doi:10.1016/j.cell.2021.05.012 (2021).
- 721 42 Fouqueau, T. *et al.* The cutting edge of archaeal transcription. *Emerg Top Life Sci* **2**,  
722 517-533, doi:10.1042/ETLS20180014 (2018).
- 723 43 Weissmann, F. *et al.* biGBac enables rapid gene assembly for the expression of large  
724 multisubunit protein complexes. *Proc Natl Acad Sci U S A* **113**, E2564-2569,  
725 doi:10.1073/pnas.1604935113 (2016).
- 726 44 Mastronarde, D. N. Automated electron microscope tomography using robust  
727 prediction of specimen movements. *J Struct Biol* **152**, 36-51,  
728 doi:10.1016/j.jsb.2005.07.007 (2005).
- 729 45 Tegunov, D. & Cramer, P. Real-time cryo-electron microscopy data preprocessing  
730 with Warp. *Nat Methods* **16**, 1146-1152, doi:10.1038/s41592-019-0580-y (2019).
- 731 46 Punjani, A., Rubinstein, J. L., Fleet, D. J. & Brubaker, M. A. cryoSPARC: algorithms for  
732 rapid unsupervised cryo-EM structure determination. *Nat Methods* **14**, 290-296,  
733 doi:10.1038/nmeth.4169 (2017).
- 734 47 Zivanov, J. *et al.* New tools for automated high-resolution cryo-EM structure  
735 determination in RELION-3. *Elife* **7**, doi:10.7554/eLife.42166 (2018).
- 736 48 Liebschner, D. *et al.* Macromolecular structure determination using X-rays, neutrons  
737 and electrons: recent developments in Phenix. *Acta Crystallogr D Struct Biol* **75**, 861-  
738 877, doi:10.1107/S2059798319011471 (2019).
- 739 49 Yang, J. *et al.* Improved protein structure prediction using predicted interresidue  
740 orientations. *Proc Natl Acad Sci U S A* **117**, 1496-1503, doi:10.1073/pnas.1914677117  
741 (2020).
- 742 50 Pettersen, E. F. *et al.* UCSF Chimera--a visualization system for exploratory research  
743 and analysis. *J Comput Chem* **25**, 1605-1612, doi:10.1002/jcc.20084 (2004).
- 744 51 Casanal, A., Lohkamp, B. & Emsley, P. Current developments in Coot for  
745 macromolecular model building of Electron Cryo-microscopy and Crystallographic  
746 Data. *Protein Sci* **29**, 1069-1078, doi:10.1002/pro.3791 (2020).
- 747 52 Prisant, M. G., Williams, C. J., Chen, V. B., Richardson, J. S. & Richardson, D. C. New  
748 tools in MolProbity validation: CaBLAM for CryoEM backbone, UnDowser to rethink

Rengachari et al.: Structure of SNAPc-containing Pol II PIC

- 749 "waters," and NGL Viewer to recapture online 3D graphics. *Protein Sci* **29**, 315-329,  
750 doi:10.1002/pro.3786 (2020).
- 751 53 Chen, Z. L. *et al.* A high-speed search engine pLink 2 with systematic evaluation for  
752 proteome-scale identification of cross-linked peptides. *Nat Commun* **10**, 3404,  
753 doi:10.1038/s41467-019-11337-z (2019).
- 754 54 Combe, C. W., Fischer, L. & Rappsilber, J. xiNET: cross-link network maps with residue  
755 resolution. *Mol Cell Proteomics* **14**, 1137-1147, doi:10.1074/mcp.O114.042259  
756 (2015).
- 757 55 Kosinski, J. *et al.* Xlink Analyzer: software for analysis and visualization of cross-linking  
758 data in the context of three-dimensional structures. *J Struct Biol* **189**, 177-183,  
759 doi:10.1016/j.jsb.2015.01.014 (2015).
- 760 56 Smith, T., Heger, A. & Sudbery, I. UMI-tools: modeling sequencing errors in Unique  
761 Molecular Identifiers to improve quantification accuracy. *Genome Res* **27**, 491-499,  
762 doi:10.1101/gr.209601.116 (2017).
- 763 57 Martin, M. Cutadapt removes adapter sequences from high-throughput sequencing  
764 reads. *2011* **17**, 3, doi:10.14806/ej.17.1.200 (2011).
- 765 58 Dobin, A. *et al.* STAR: ultrafast universal RNA-seq aligner. *Bioinformatics* **29**, 15-21,  
766 doi:10.1093/bioinformatics/bts635 (2013).
- 767 59 O'Leary, N. A. *et al.* Reference sequence (RefSeq) database at NCBI: current status,  
768 taxonomic expansion, and functional annotation. *Nucleic Acids Res* **44**, D733-745,  
769 doi:10.1093/nar/gkv1189 (2016).
- 770 60 Team, R. RStudio: Integrated Development for R. (*Boston, MA, RStudio, PBC*) (2020).
- 771 61 Team, R. C. R. (*Vienna, Austria, R Foundation for Statistical Computing*) (2019).
- 772 62 Gentleman, R. C. *et al.* Bioconductor: open software development for computational  
773 biology and bioinformatics. *Genome Biol* **5**, R80, doi:10.1186/gb-2004-5-10-r80  
774 (2004).
- 775 63 Huber, W. *et al.* Orchestrating high-throughput genomic analysis with Bioconductor.  
776 *Nat Methods* **12**, 115-121, doi:10.1038/nmeth.3252 (2015).
- 777 64 Wickham, H. ggplot2: Elegant Graphics for Data Analysis. (*Springer-Verlag New York*)  
778 (2016).
- 779 65 Yin, T., Cook, D. & Lawrence, M. ggbio: an R package for extending the grammar of  
780 graphics for genomic data. *Genome Biol* **13**, R77, doi:10.1186/gb-2012-13-8-r77  
781 (2012).
- 782 66 Notredame, C., Higgins, D. G. & Heringa, J. T-Coffee: A novel method for fast and  
783 accurate multiple sequence alignment. *J Mol Biol* **302**, 205-217,  
784 doi:10.1006/jmbi.2000.4042 (2000).
- 785 67 Robert, X. & Gouet, P. Deciphering key features in protein structures with the new  
786 ENDscript server. *Nucleic Acids Res* **42**, W320-324, doi:10.1093/nar/gku316 (2014).
- 787  
788  
789  
790  
791  
792  
793  
794  
795  
796  
797

Rengachari et al.: Structure of SNAPc-containing Pol II PIC

798

799

800 **FIGURES**

801

802 **Figure 1 | Preparation of SNAPc-containing Pol II PIC on non-coding RNA promoters**

803 a) SDS-PAGE analysis of SNAPc variants (FL, core) purified to homogeneity.

804 b) EMSA shows the binding of SNAPc ( $\pm$  TBP, TFIIB) to U1 and U5 promoter DNA. The  
805 presence of SNAPc stabilises the binding of TBP-TFIIB to snRNA promoters.

806 c) SDS-PAGE analysis of SNAPc containing Pol II PIC variants isolated through a sucrose  
807 gradient ultracentrifugation.

808 d) In vitro transcription assay showing the relative influence of SNAPc variants on Pol II  
809 snRNA transcription with different combinations of GTFs'.

810 e) Histogram plots representing the quantification (Methods) of full-length transcripts from the  
811 *in vitro* transcription assay in panel d.

812

Rengachari et al.: Structure of SNAPc-containing Pol II PIC

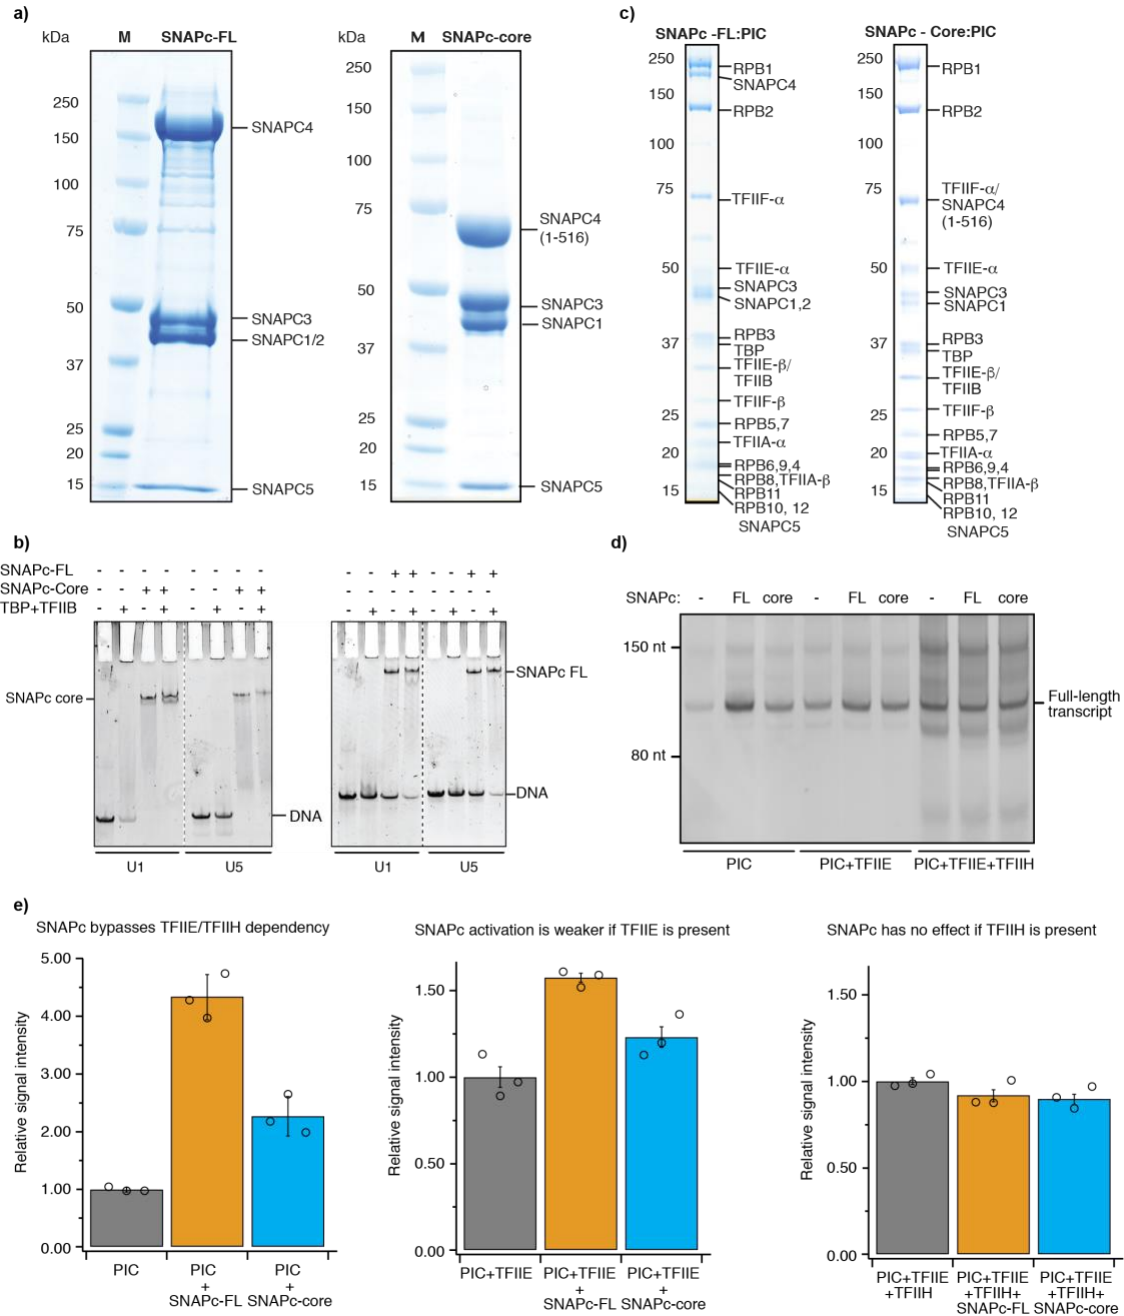

813

814 **Figure 2 | Overall structure of SNAPc-containing Pol II PIC**

815 a) Schematic 2D representation of the U1 and U5 promoter sequences highlighting the binding  
 816 motifs of the initiation machinery as observed in the cryo-EM structure: PSE (SNAPc), TBP  
 817 binding site (TBP) and TSS (Pol II). The transcription start site (TSS) is denoted +1 and  
 818 negative and positive numbers indicate upstream and downstream positions.

819 b) Cartoon representation of the SNAPc-containing Pol II PIC as viewed from the front and  
 820 top. The colour codes for Pol II and the GTFs' are consistently used throughout.

821



Rengachari et al.: Structure of SNAPc-containing Pol II PIC

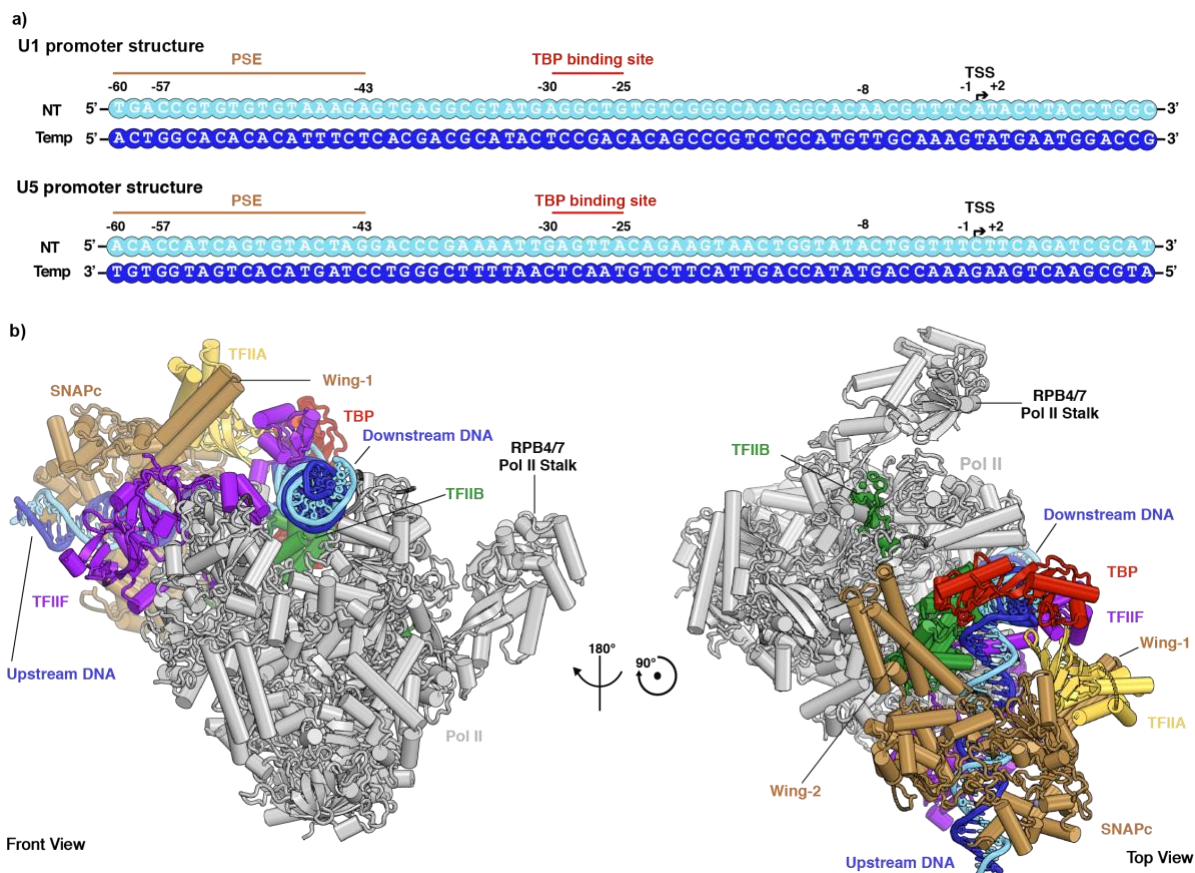

822

823

824 **Figure 3 | Structure of SNAPc**

825 a) 2D-domain schematics of individual SNAPc subunits. The regions visible in the 3D structure

826 are marked by dotted-lines.

827 b) SNAPc structure in cartoon representation. Domain nomenclature and colours are used as

828 described in panel a. Dashed boxes indicate the interfaces between the subunits.

829 c, d) Close up view of interfaces 1 and 2 that are formed between SNAPC1 (pink) and SNAPC3

830 (orange). The residues V115, F120, A123, Y124 of SNAPC1 and V86, L90, L100, C104 of

831 SNAPC3 form mainly hydrophobic interactions, whereas ionic interactions are formed between

832 R34, R47, K96, R128 of SNAPC1 and D89, D107, E153, D332 of SNAPC3. F54 of SNAPC1

833 and R133 of SNAPC3 form a cation-pi interaction and N49 of SNAPC1 and Y157 of SNAPC3

834 form polar contacts. Similarly in interface 2: SNAPC1 L101, W104, F137 and A139 form

835 hydrophobic contacts with F47, L50, W51, L55 and L305 of SNAPC3. Salt-bridges involving

836 R98, D105 of SNAPC1 and R54 and D325 of SNAPC3 fortify interface 2.

837 e, f) Interfaces 3 and 4 between SNAPC3 (orange) and SNAPC4 (chestnut brown). In interface

838 3, SNAPC3 residues F155, W348, F355, V356, Y360, T361, P372, F377, T409 form the bulk

839 of hydrophobic contacts with F331, L334, L344 and H369 of SNAPC4 (Figure 3e). Likewise

840 in interface 4 the residues Y253, I274, W277, P308 and L310 make hydrophobic contacts with

841 the amino acids F140, Y149, F150, F176 of SNAPC4. Additional salt bridges are formed by

842 R133, R283 of SNAPC3 with D152 and E153 of SNAPC4. The Zn-fingers (ZF-1, ZF-2) of

843 SNAPC3 are in close proximity to the interfaces 3 and 4, and would be important for the

844 structural integrity of this complex. The residues involved in these protein-protein interaction

845 surfaces are highly conserved across metazoans (Extended Data Figure 7).

Rengachari et al.: Structure of SNAPc-containing Pol II PIC

846

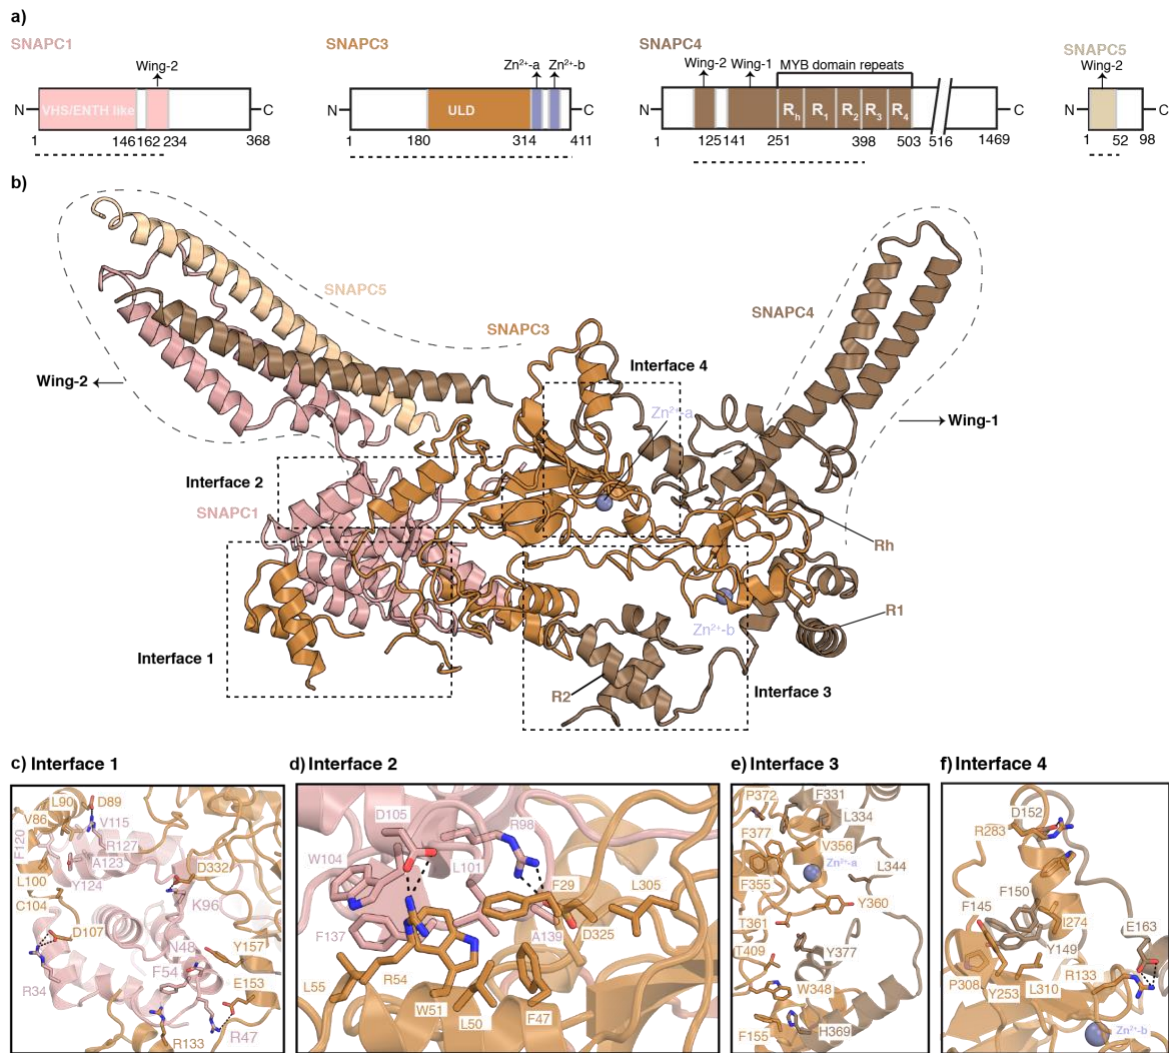

847

848

849

850

851

852

853

854

855

856

857

**Figure 4 | SNAPc-DNA interactions**

858

859

860

861

862

863

864

a) Schematic view of the protein-DNA interactions between SNAPc and the PSE motif. Residues interacting with specific regions of the DNA as described in the text are indicated by lines. In panels b and c, nucleotide residues are numbered in atomic colour to indicate the strand and the DNA register

b) DNA-protein interaction network on the preceding major and minor grooves (register: -46 to -35) of PSE as bound by SNAPc subunits SNAPC3 and SNAPC4. Colour codes are used uniformly in all panels.

Rengachari et al.: Structure of SNAPc-containing Pol II PIC

865 c) Close up view of the first major and minor groove (register: -57 to -47 ) interactions between  
 866 SNAPc and the PSE motif on U5 promoter. The SNAPc subunits are represented as cartoon,  
 867 whereas the interacting amino acid sidechain residues, DNA chains are depicted as sticks with  
 868 atomic colours. Dashed lines indicate ionic interactions.  
 869

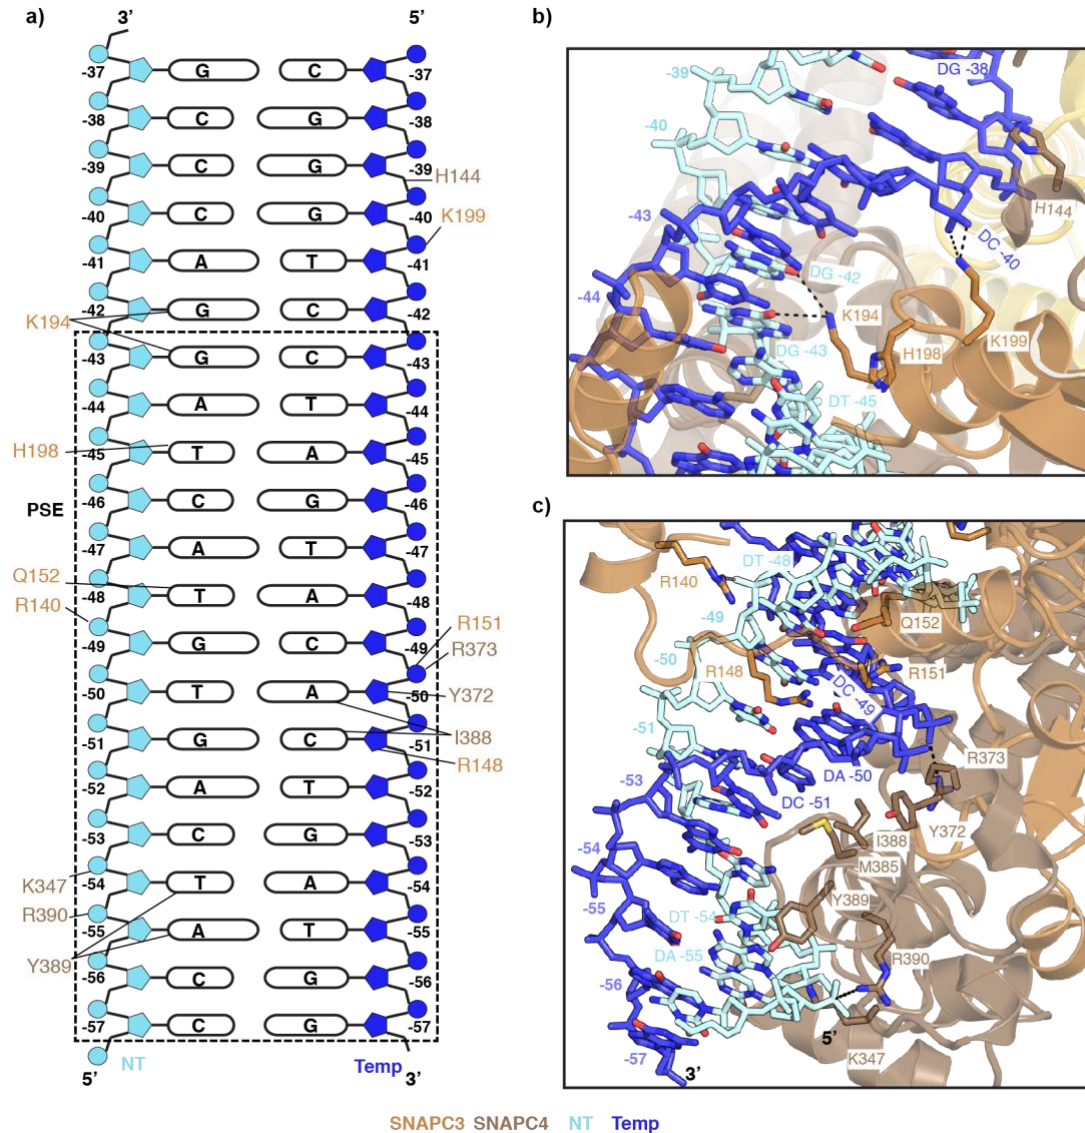

870  
 871  
 872  
 873  
 874  
 875  
 876  
 877  
 878  
 879  
 880  
 881  
 882

**Figure 5 | SNAPc-general transcription factors interaction**

a) Close up view of wing-1:TFIIA interaction. The amino acid residues involved in the formation of interfaces A and B between TFIIA (yellow orange) and SNAPc4 (chestnut brown) are represented as sticks. Dashed lines indicate salt-bridges.

b) Zoomed in view of the interface C formed between wing-2 and TFIIB C-terminal cyclin fold. The C $\alpha$  atoms of putative residues forming the interaction surface are represented as spheres.



Rengachari et al.: Structure of SNAPc-containing Pol II PIC

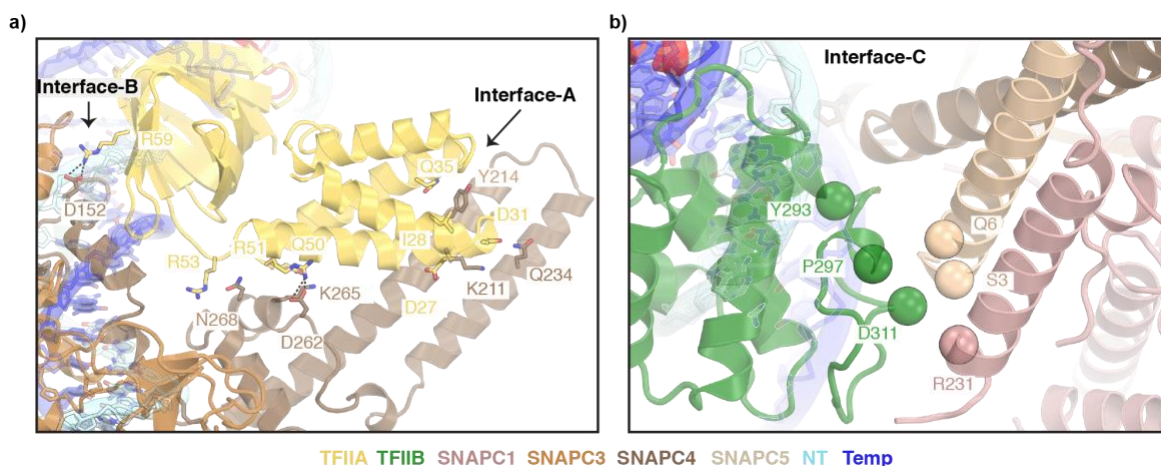

883  
884  
885  
886  
887  
888  
889  
890  
891  
892  
893  
894  
895  
896  
897  
898  
899  
900  
901  
902  
903  
904  
905  
906  
907  
908  
909

**Figure 6 | Promoter opening**

a) Structure of SNAPc-containing Pol II PIC bound to U1 promoter in closed promoter complex (CC) state. The subunits are coloured as in Figure 1. The nucleotide residue at the TSS (+1) on the template strand (blue) is represented as spheres (green). The Pol II active site metal ion A is depicted as a magenta sphere.

b) Structure of SNAPc-containing Pol II PIC bound to U1 promoter in open promoter complex (OC) state. The inset represents a zoom into the active center containing open promoter DNA. The catalytic  $Mg^{2+}$  ion at the active site is represented as a magenta sphere. The B-reader helix of TFIIB and the charged helix of TFIIF are highlighted alongside the +1 nucleotide residue represented as a sphere (green).

c) Box plots showing TSS precision of protein-coding and snRNA genes (N=18) transcribed by Pol II in cells. Protein-coding genes are sub-grouped based on promoter sequence into TATA-less (TATA-, N=4521) and TATA-containing (TATA+, N=200) subsets. The thickened line represents the median value, the hinges correspond to the first and third quartiles, and the notches extend to 1.58 times the inter-quartile range divided by the square root of N. The whiskers represent the largest or smallest value within the 1.5 times inter-quartile range from the hinge, outliers are shown in black. The precision scores were determined from published 5'cap-seq data<sup>35</sup> (Methods).

d) Annotated transcripts of representative examples from subsets in 6C and genome browser views showing 5'cap-seq signal in the magnified region ( $\pm 100$  bp) centered at the main TSS peak. The annotated gene region is shown below the views and only sense strand signal is shown.

Rengachari et al.: Structure of SNAPc-containing Pol II PIC

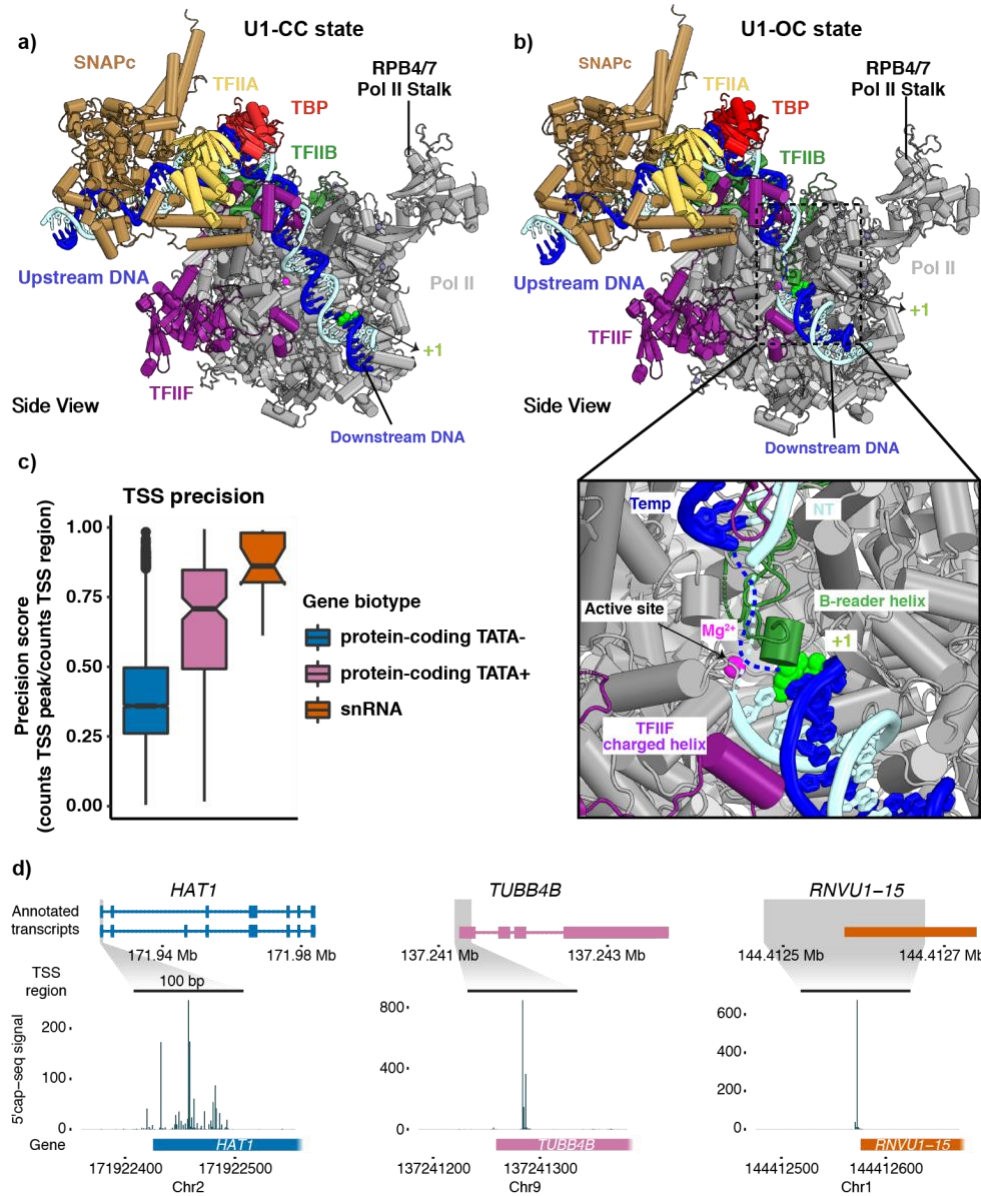

910  
 911  
 912  
 913  
 914  
 915  
 916  
 917  
 918  
 919  
 920  
 921  
 922  
 923  
 924  
 925  
 926



Rengachari et al.: Structure of SNAPc-containing Pol II PIC

927 **Figure 7 | Comparisons of Pol II PICs for mRNA and snRNA synthesis.**

928 a) The Pol II PIC on protein coding genes bound to its elaborate array of initiation factors such  
929 as TFIIA, TFIIB, TFIID, TFIIIE, TFIIIF, TFIIH and Mediator complex.

930 b) The Pol II PIC for snRNA transcription requires SNAPc but not TFIIIE, TFIIH and Mediator  
931 to initiate transcription.

932  
933

a) Pol II mRNA transcription PIC

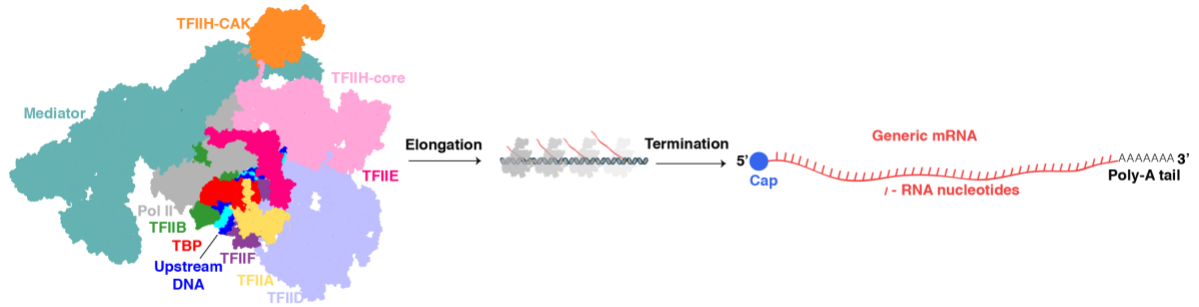

b) Pol II snRNA transcription PIC

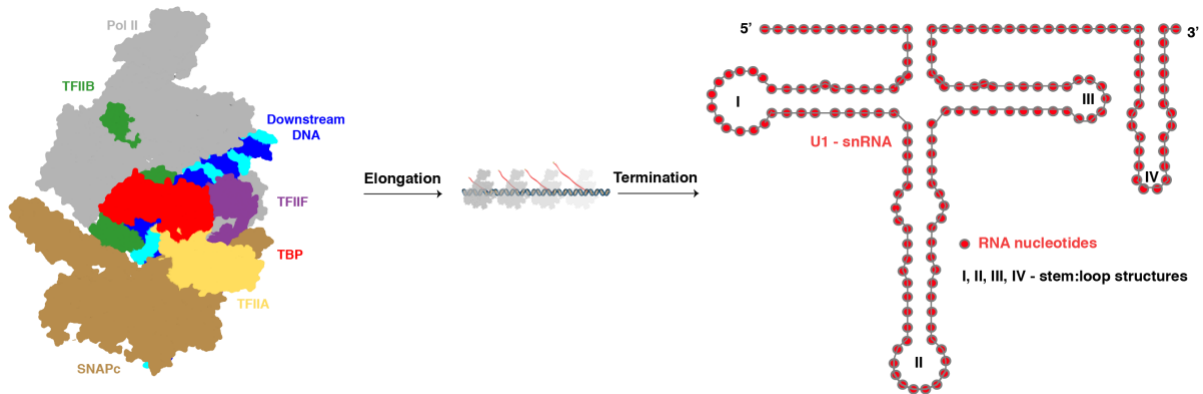

934

935 **EXTENDED DATA FIGURES**

936

937 **Extended Data Figure 1 | Processing of cryo-EM data for SNAPc-containing Pol II PIC**  
938 **bound to U1 promoter. Related to figure 2.**

939 a) Representative cryo-EM micrograph of the SNAPc-containing Pol II PIC bound to U1  
940 promoter cryo-EM data collection. Scale bar – 240 Å

941 b) Representative 2D class averages of initially sorted datasets after merging. Adjacent to a  
942 well-defined PIC, clear signal for SNAPc is detected.

943 c) Complete processing scheme. After initial clean-up procedures, particles representing  
944 SNAPc containing PIC were recovered as two sets. These particle sets were processed  
945 separately with respect to the promoter DNA state (CC/OC) and SNAPc occupancy. Final maps  
946 are coloured using the subunit color code in Figure 1. The local resolution map indicate the  
947 resolution range of final maps (scale bar).

948

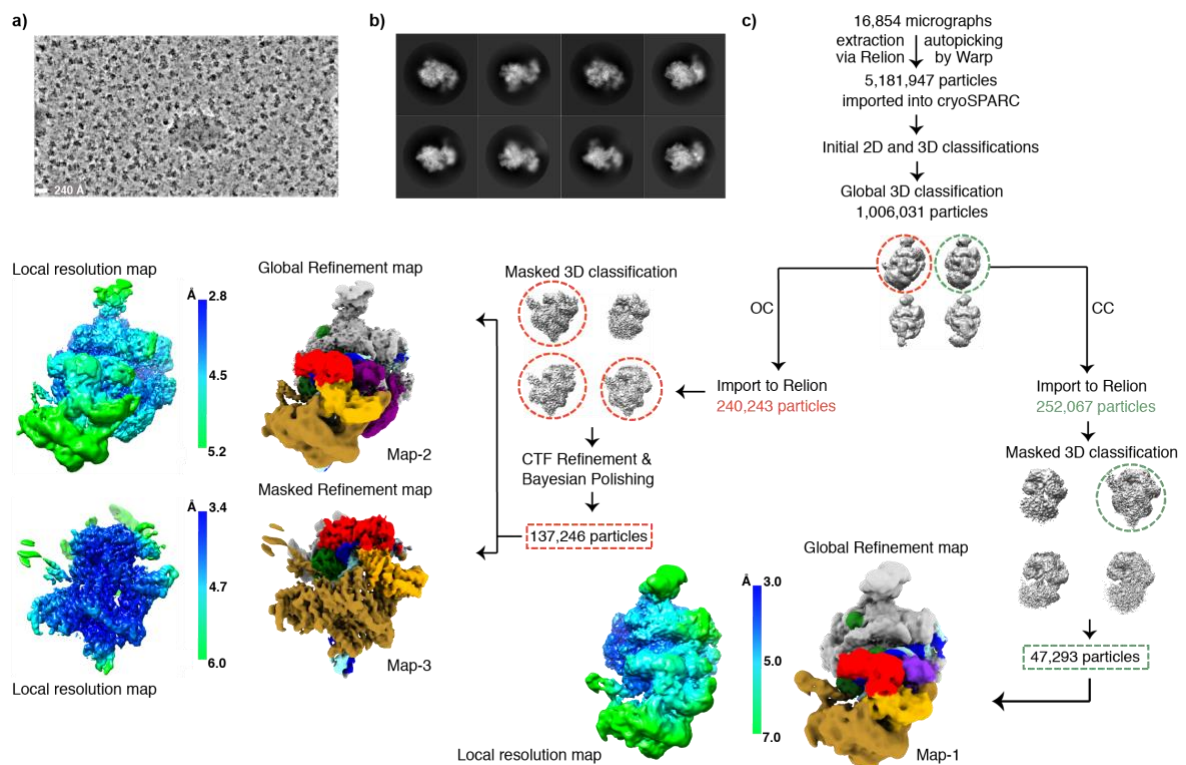

949

950

951

952

953

954

955

956

957

958

959

960

Rengachari et al.: Structure of SNAPc-containing Pol II PIC

961 **Extended Data Figure 2 | Processing of cryo-EM data for SNAPc-containing Pol II PIC**  
962 **bound to U5 promoter. Related to Figure 2**

963 a) Representative cryo-EM micrograph of the SNAPc-containing Pol II PIC bound to U5  
964 promoter cryo-EM data collection. Scale bar – 240 Å.

965 b) Representative 2D class averages of initially sorted datasets after merging. As in the case of  
966 U1 promoter dataset, a clear signal for SNAPc is detected adjacent to a well-defined PIC.

967 c) Complete processing scheme. The optimized strategy from U1 promoter bound SNAPc-PIC  
968 dataset was used to obtain high resolution maps of SNAPc-PIC bound to U5 promoter. Final  
969 maps are coloured using the subunit color code in Figure 1. The local resolution map of global  
970 and locally refined maps indicate the resolution range of final maps (scale bar).  
971

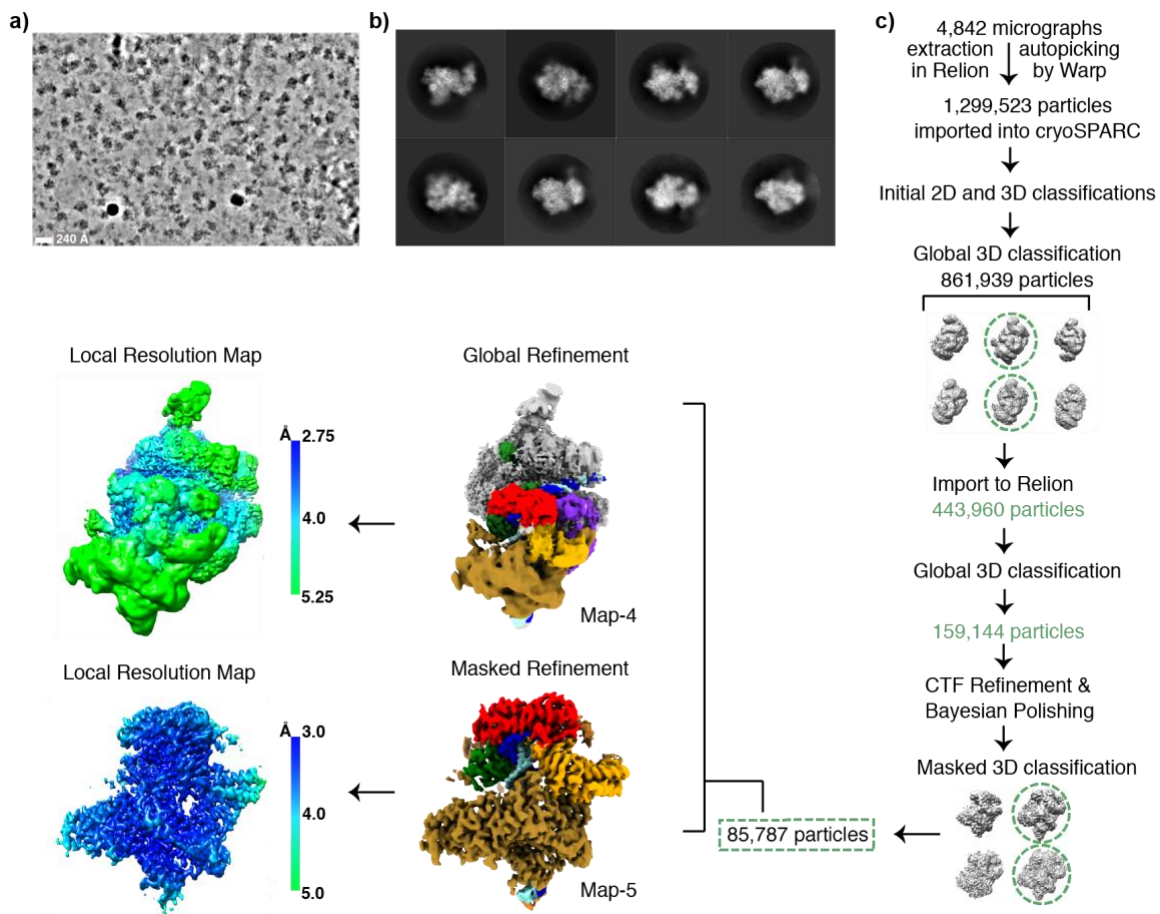

972  
973  
974  
975  
976  
977  
978  
979  
980  
981  
982  
983  
984

Rengachari et al.: Structure of SNAPc-containing Pol II PIC

985 **Extended Data Figure 3 | FSC and angular distribution plot of cryo-EM reconstructions.**  
 986 **Related to Figure 2**

987 a-e) On the left - FSC plot showing the overall resolution of the reconstructions determined by  
 988 the gold standard FSC cut-off 0.143, indicated in the graph. In the middle – angular distribution  
 989 plot of the respective reconstruction showing assignment of particles with respect to various  
 990 angles. Colour bar indicates number of samples per angular bin (white areas indicate  
 991 unpopulated angles). On the right - Model-to-map FSCs, showing the fit of modelled structures  
 992 to their corresponding maps.

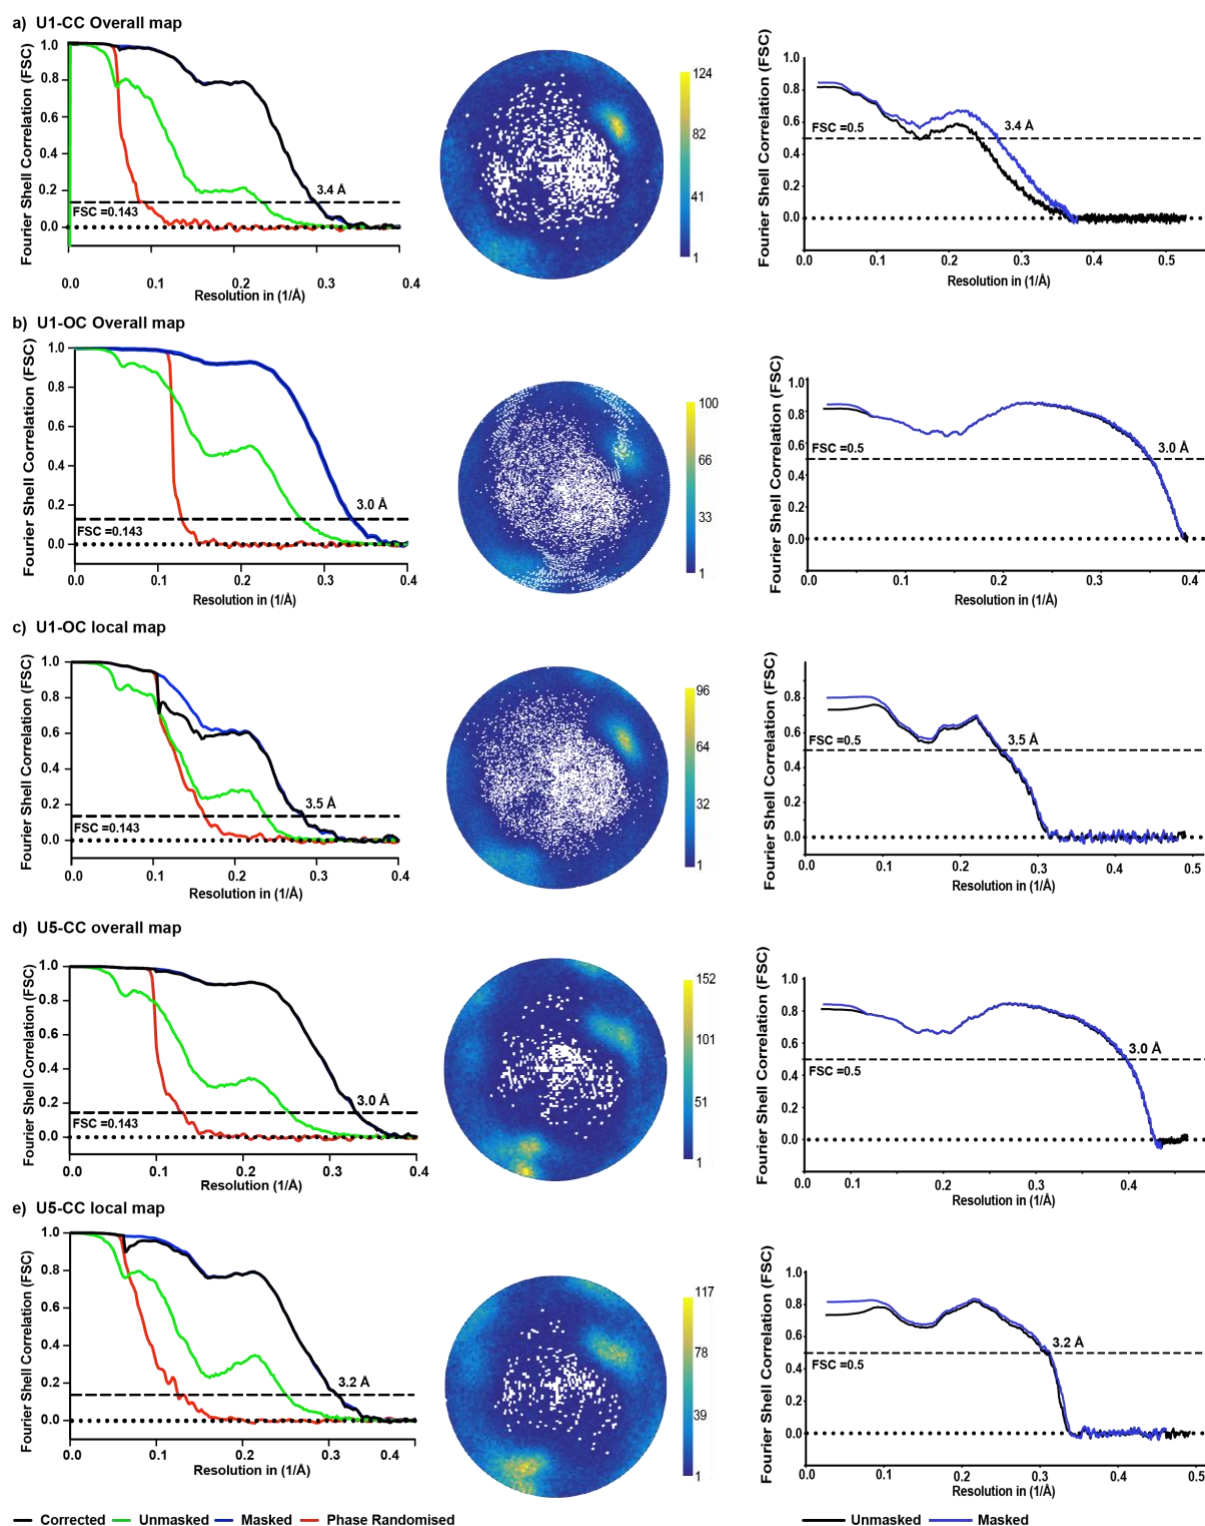

993

994 **Extended Data Figure 4 | Structural comparison of TBP bound to TATA containing and**  
995 **TATA-less DNA template; Overall of Structure of individual SNAPc subunits. Related to**  
996 **Figures 2 and 3**

997 a) Structural super-position of TBP(red) bound TATA-less U1 promoter (cyan/blue) on to TBP  
998 (grey) bound to TATA box sequence (PDB: 1YTF)(Tan et al., 1996). The comparison shows  
999 that TBP binds to the TATA-less sequence in a canonical fashion and bends the DNA by 90°  
1000 b-e) Cartoon representation of the individual structures of SNAPc subunits SNAPc1, 3, 4 and  
1001 5 displaying its secondary structure elements as labelled. The N and C termini of all subunits  
1002 are indicated.  
1003

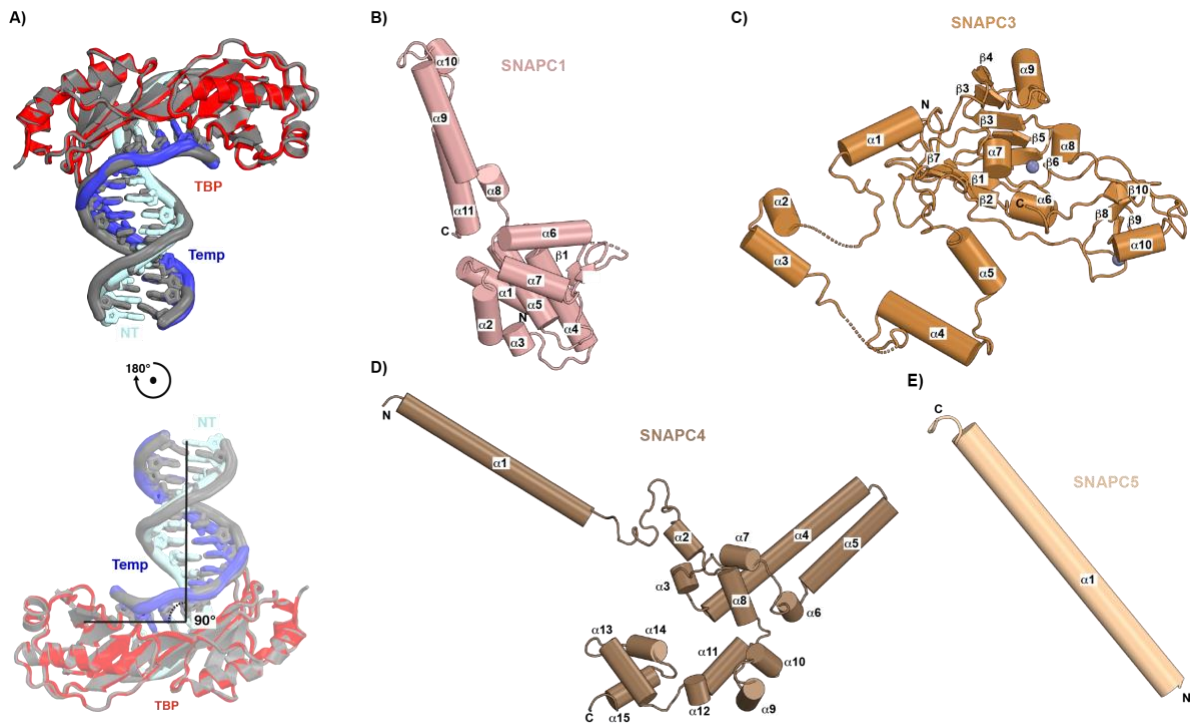

1004  
1005  
1006  
1007  
1008  
1009  
1010  
1011  
1012  
1013  
1014  
1015  
1016  
1017  
1018  
1019  
1020  
1021



Rengachari et al.: Structure of SNAPc-containing Pol II PIC

1022 **Extended Data Figure 5 | Map quality and map to model fit. Related to Figure 3**

1023 a-h) Sections of cryo-EM density of SNAPc subunits overlaid with their respective atomic  
 1024 models. Densities are shown as a grey mesh, and sticks are shown for the model as coloured in  
 1025 Figure 3.

1026 i) cryo-EM density of the TFIIB subunit overlaid to the atomic within the SNAPc containing  
 1027 Pol II PIC bound to U1 promoter in OC state.

1028 j) cryo-EM density of a region of TFIIF subunit overlaid to the atomic model within the SNAPc  
 1029 containing Pol II PIC bound to U1 promoter in OC state.

1030 d) Local map of SNAPc containing Pol II PIC bound to U1 promoter in OC state is low pass  
 1031 filtered to 5Å. The corresponding map is fitted with SNAPc subunits representing map to model  
 1032 fit, in particular the ‘wing-2’ region modelled using AlphaFold2<sup>27</sup>.

1033  
 1034  
 1035

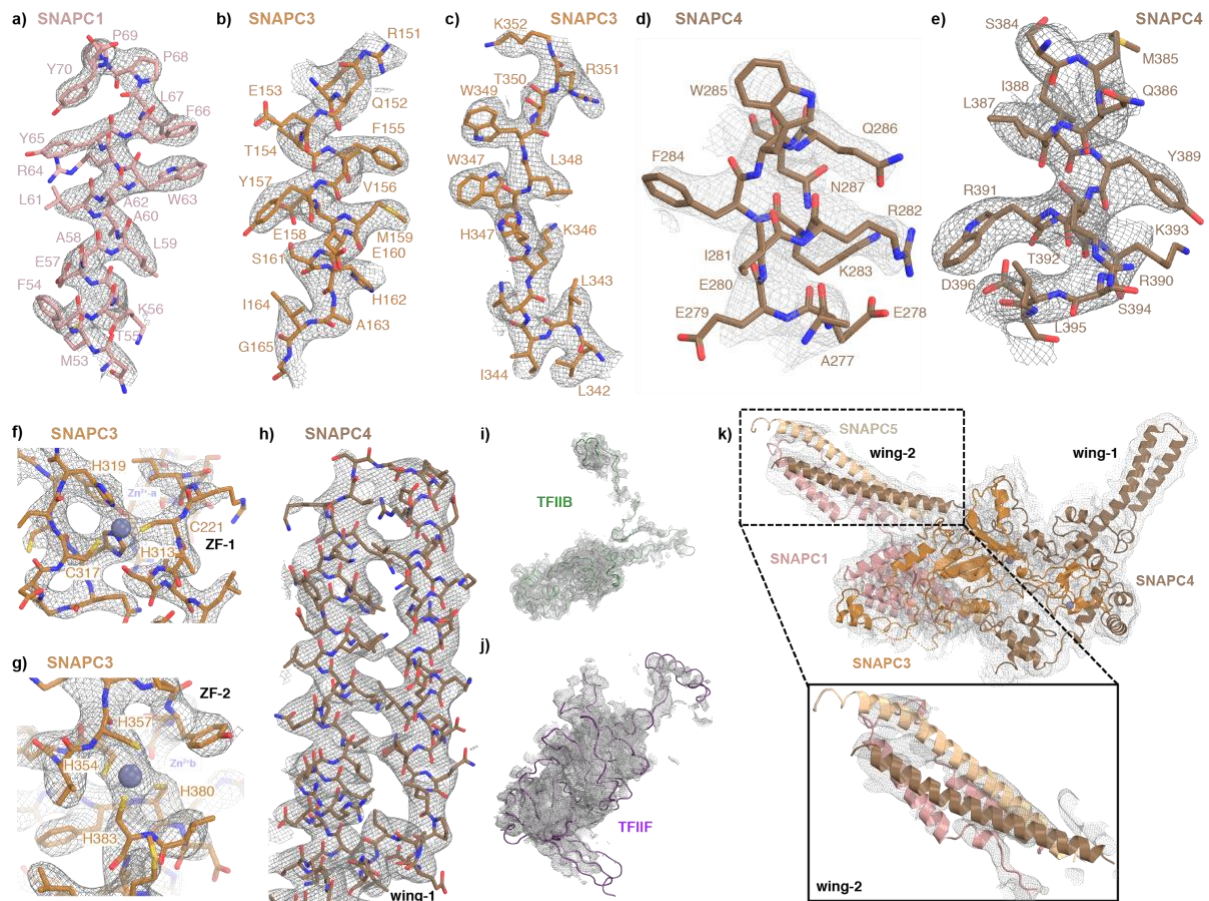

1036  
 1037  
 1038  
 1039  
 1040  
 1041  
 1042  
 1043  
 1044  
 1045

Rengachari et al.: Structure of SNAPc-containing Pol II PIC

1046 **Extended Data Figure 6: Crosslinking mass-spectrometric analysis of SNAPc containing**  
1047 **Pol II PIC. Related to Figures 2 and 3**

1048 a) 2D representation of the overview of BS3 crosslinks. The crosslinks correspond to inter-  
1049 protein mono-links that have at least three crosslinked peptide-spectrum matches (CSM). The  
1050 subunit colours are consistent with Figure 2.

1051 b) Crosslinks as mapped to SNAPc containing Pol II PIC structure using Xlink analyzer<sup>55</sup>  
1052 plugin in UCSF chimera. The inset show the crosslinks observed between SNAPc subunits and  
1053 the GTFs' TFIIA and TFIIB respectively.

1054 c) Histogram representing the distribution of C $\alpha$  pair distances of unique crosslinks mapped to  
1055 the structure. Dotted line indicates the 30Å cut-off for BS3 crosslinked C $\alpha$  pair. A total of  
1056 87.8% of the crosslinks were satisfied within this 30 Å cutoff.

1057  
1058

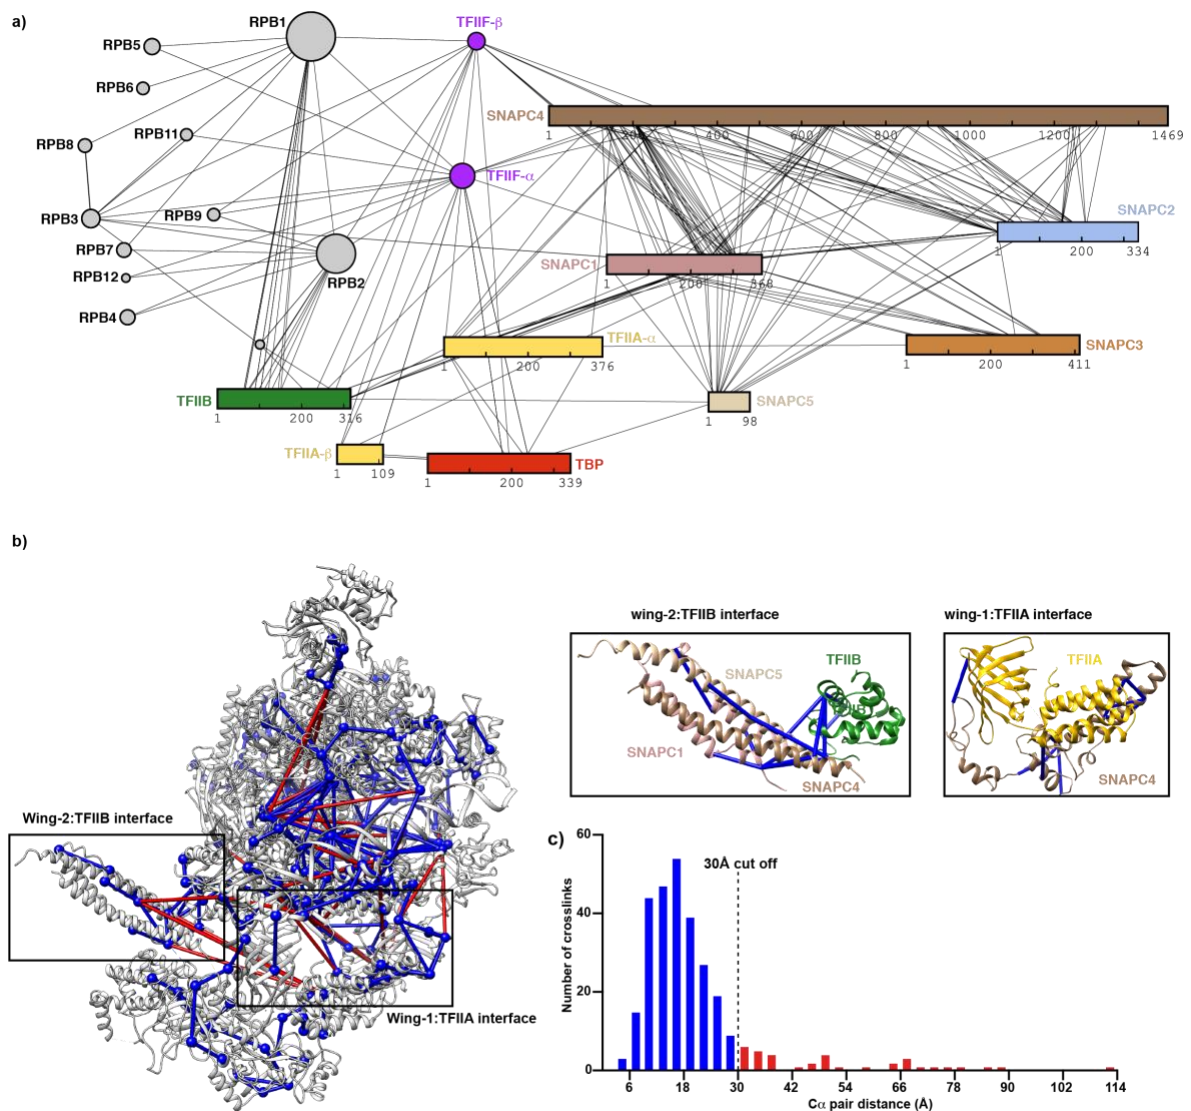

1059  
1060  
1061  
1062  
1063  
1064  
1065  
1066

Rengachari et al.: Structure of SNAPc-containing Pol II PIC

1067 **Extended Data Figure 7 | Structure based sequence alignment of SNAPc subunits involved**  
 1068 **in interactions. Related to Figures 3 and 4**

1069 Sequence alignments were performed with the regions of individual subunits for which the  
 1070 structure has been determined in this study. T-Coffee algorithm<sup>66</sup> was adopted to obtain a  
 1071 structure based sequence alignment which was then visualized using ESPrpt<sup>67</sup>. Residues with  
 1072 identity above 80% are coloured red. Regions involved in interactions are indicated by dashed  
 1073 boxes and labels.  
 1074

**SNAPC1**

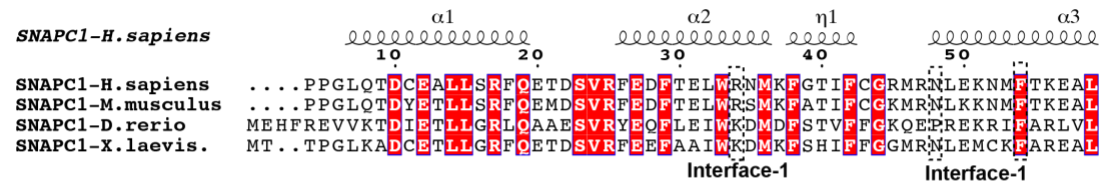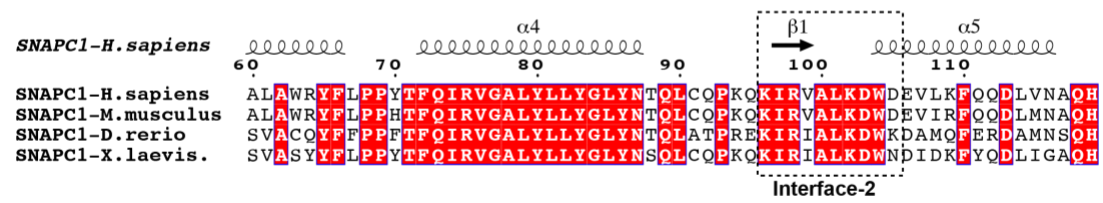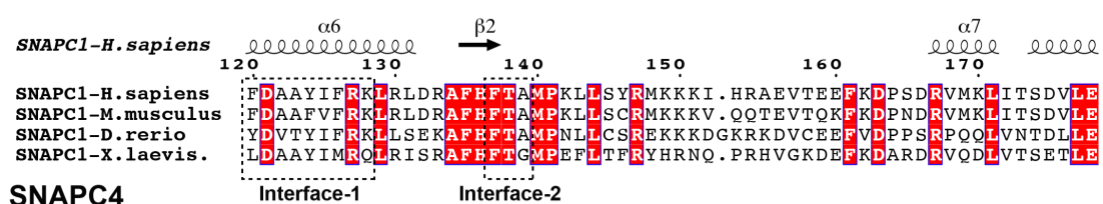

**SNAPC4**

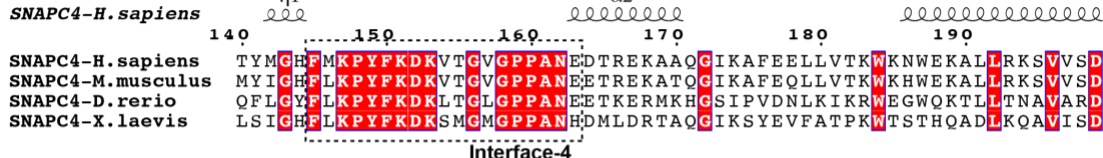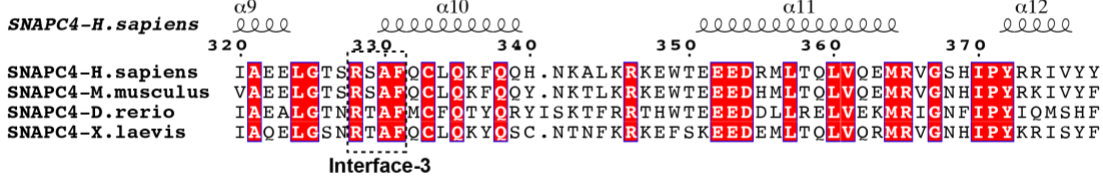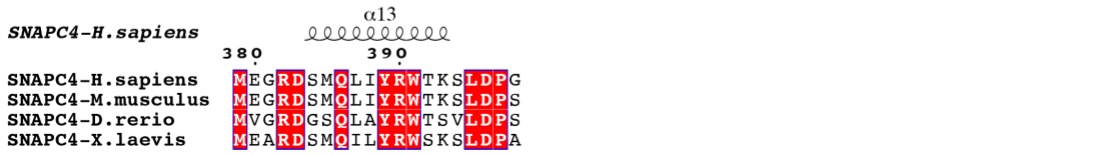

1075  
 1076  
 1077  
 1078  
 1079  
 1080  
 1081  
 1082



Rengachari et al.: Structure of SNAPc-containing Pol II PIC

**SNAPC3**

*SNAPC3-H. sapiens*

*SNAPC3-H. sapiens*  
*SNAPC3-M. musculus*  
*SNAPC3-D. rerio*  
*SNAPC3-X. laevis*

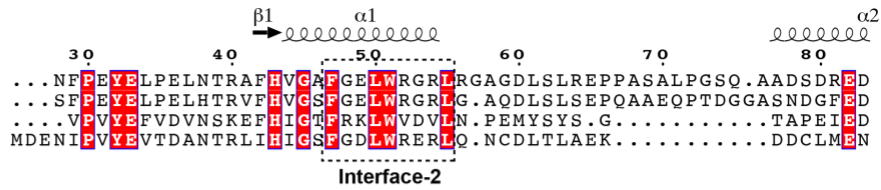

*SNAPC3-H. sapiens*

*SNAPC3-H. sapiens*  
*SNAPC3-M. musculus*  
*SNAPC3-D. rerio*  
*SNAPC3-X. laevis*

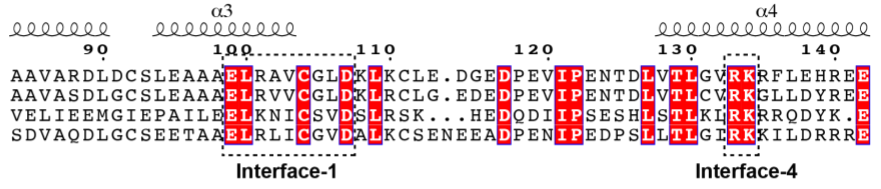

*SNAPC3-H. sapiens*

*SNAPC3-H. sapiens*  
*SNAPC3-M. musculus*  
*SNAPC3-D. rerio*  
*SNAPC3-X. laevis*

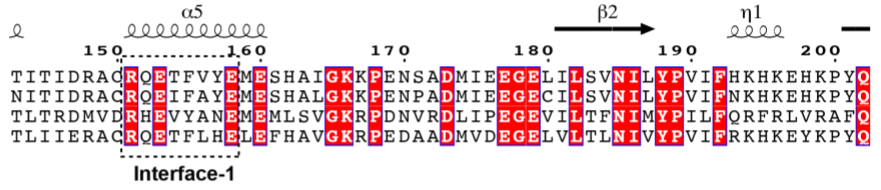

*SNAPC3-H. sapiens*

*SNAPC3-H. sapiens*  
*SNAPC3-M. musculus*  
*SNAPC3-D. rerio*  
*SNAPC3-X. laevis*

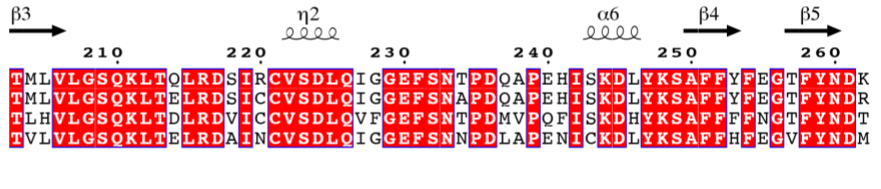

*SNAPC3-H. sapiens*

*SNAPC3-H. sapiens*  
*SNAPC3-M. musculus*  
*SNAPC3-D. rerio*  
*SNAPC3-X. laevis*

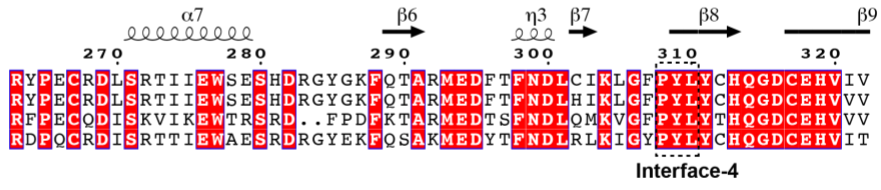

*SNAPC3-H. sapiens*

*SNAPC3-H. sapiens*  
*SNAPC3-M. musculus*  
*SNAPC3-D. rerio*  
*SNAPC3-X. laevis*

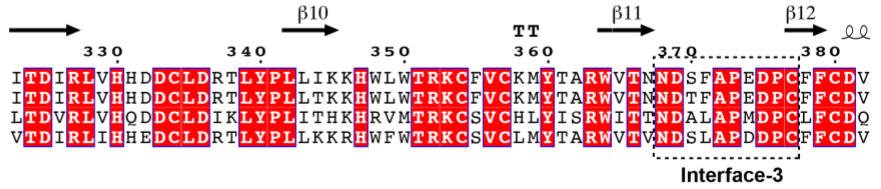

*SNAPC3-H. sapiens*

*SNAPC3-H. sapiens*  
*SNAPC3-M. musculus*  
*SNAPC3-D. rerio*  
*SNAPC3-X. laevis*

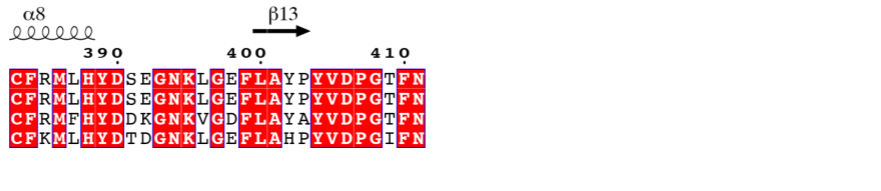

1083  
 1084  
 1085  
 1086  
 1087  
 1088  
 1089  
 1090  
 1091  
 1092  
 1093  
 1094

Rengachari et al.: Structure of SNAPc-containing Pol II PIC

1095 **Extended Data Figure 8: Related to Figures 4, 5 and 6**

1096 a) Birds-eye view of the SNAPc interaction with the GTFs' and the PSE motif on U5 snRNA  
 1097 promoter. The dashed boxes indicate the observed interaction surfaces within the complex (1-  
 1098 4).

1099 b) Structural super-position of ideal B-DNA of U5 promoter to the SNAPc bound experimental  
 1100 DNA structure. Major and minor grooves of U5 promoter bound by SNAPC3 and SNAPC4 are  
 1101 labelled and highlighted with lines. Dashed box indicates the PSE region.

1102 c) Close up view of SNAPC3 helix  $\alpha 8$  binding to major groove of U5 promoter. The observed  
 1103 steric clash of K194 with B-DNA highlights the distortion upon SNAPc binding.

1104 d) Close up view of SNAPC3 helices  $\alpha 4$ ,  $\alpha 5$  region binding to minor groove of U5 promoter.  
 1105 The views in panels c and d correspond to Figure 4b, c

1106 e) Sequence logos of DNA sequence surrounding TSS peaks in expressed constitutive  
 1107 first/single exons for all snRNA genes (n=18) and protein coding genes (n=4721), sorted by  
 1108 TSS precision scores. The boxes indicate the IMR region (-8 to +2) of promoter flanking the  
 1109 TSS (+1). While the protein coding genes do not show any enrichment of specific nucleotides,  
 1110 snRNA genes present a AT-rich profile in the IMR region, indicating its tendency for  
 1111 spontaneous promoter opening.  
 1112

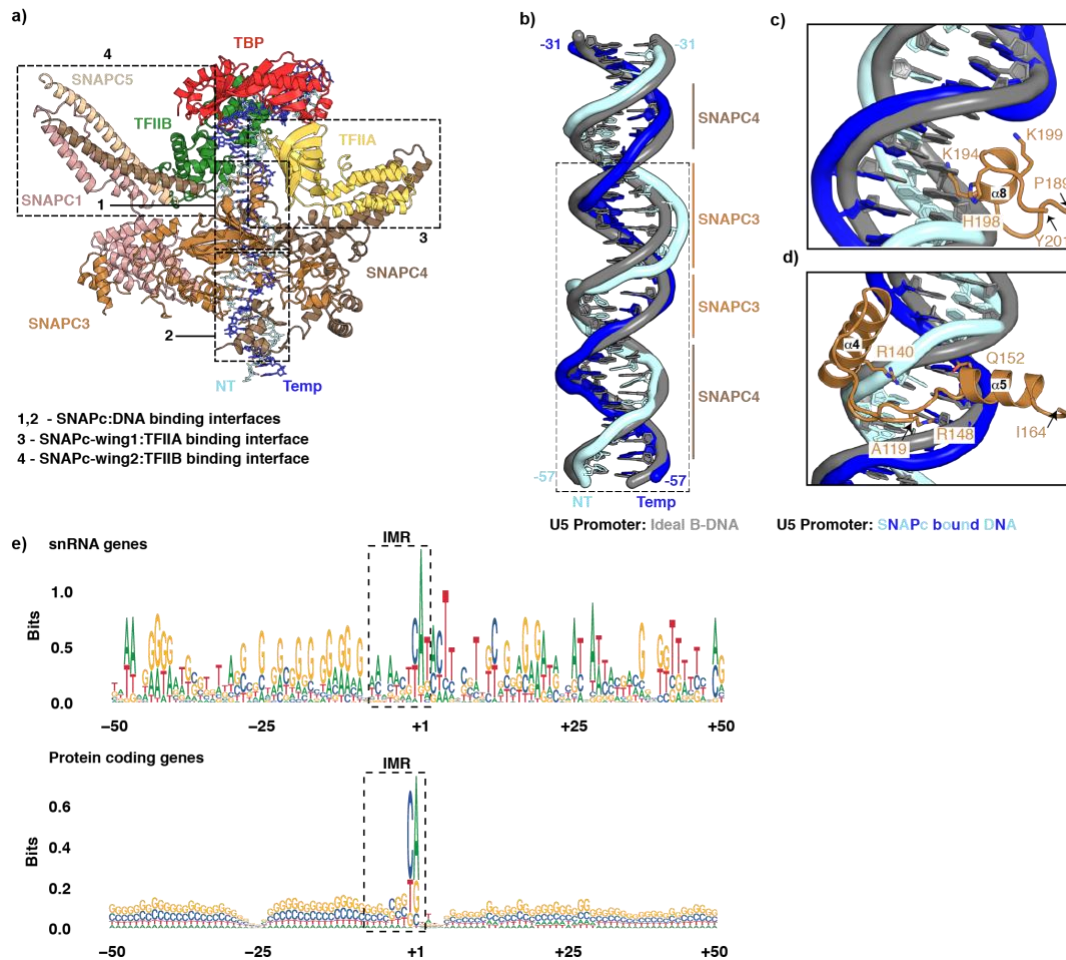

1113  
 1114  
 1115  
 1116  
 1117  
 1118  
 1119



Rengachari et al.: Structure of SNAPc-containing Pol II PIC

1120 **EXTENDED DATA TABLE**

1121

1122 **Extended Data Table 1 | Cryo-EM data collection, refinement and validation statistics.**

|                                                  | RNU1-OC<br>(EMDB-xxxx)<br>(PDB xxxx) | RNU1-OC<br>Local map<br>(EMDB-<br>xxxx) | RNU1-CC<br>(EMDB-<br>xxxx)<br>(PDB xxxx) | RNU5-CC<br>(EMDB-<br>xxxx)<br>(PDB xxxx) | RNU5-CC<br>Local map<br>(EMDB-<br>xxxx) |
|--------------------------------------------------|--------------------------------------|-----------------------------------------|------------------------------------------|------------------------------------------|-----------------------------------------|
| <b>Data collection and processing</b>            |                                      |                                         |                                          |                                          |                                         |
| Magnification                                    |                                      | 81,000x                                 |                                          | 81,000x                                  |                                         |
| Voltage (kV)                                     |                                      | 300                                     |                                          | 300                                      |                                         |
| Electron exposure (e-/Å <sup>2</sup> )           |                                      | 54.45                                   |                                          | 51.93                                    |                                         |
| Defocus range (µm)                               |                                      | -0.5 to -3.0                            |                                          | -0.5 to -2.5                             |                                         |
| Pixel size (Å)                                   |                                      | 1.05                                    |                                          | 1.05                                     |                                         |
| Micrographs collected                            |                                      | 16,854                                  |                                          | 4,842                                    |                                         |
| Initial particle images<br>(no.)                 |                                      | 5,181,947                               |                                          | 1,299,523                                |                                         |
| Final particle images (no.)                      | 137,246                              | 137,246                                 | 47,293                                   | 85,787                                   | 85,787                                  |
| Map resolution (Å)                               | 3.0                                  | 3.5                                     | 3.4                                      | 3.0                                      | 3.2                                     |
| FSC threshold                                    | 0.143                                | 0.143                                   | 0.143                                    | 0.143                                    | 0.143                                   |
| Map resolution range (Å)                         | 2.8 – 5.2                            | 3.4 – 6.0                               | 3.0 – 7.0                                | 2.75 – 5.25                              | 3.0 – 5.0                               |
| <b>Refinement</b>                                |                                      |                                         |                                          |                                          |                                         |
| Initial model used (PDB code)                    | 7NVU                                 | 7NVU                                    | 7NVS                                     | 7NVS                                     | 7NVS                                    |
| Map sharpening <i>B</i> factor (Å <sup>2</sup> ) | -10                                  | -10                                     | -5                                       | -10                                      | -10                                     |
| Model composition                                |                                      |                                         |                                          |                                          |                                         |
| DNA                                              | 126                                  | 93                                      | 132                                      | 132                                      | 83                                      |
| Protein residues                                 | 5842                                 | 1500                                    | 5789                                     | 5789                                     | 1500                                    |
| Ligands                                          | 11                                   | 2                                       | 12                                       | 12                                       | 2                                       |
| <i>B</i> factors (Å <sup>2</sup> )               |                                      |                                         |                                          |                                          |                                         |
| DNA                                              | 227.04                               | 173.83                                  | 318.34                                   | 248.19                                   | 95.70                                   |
| Protein residues                                 | 111.18                               | 185.97                                  | 215.69                                   | 124.47                                   | 109.50                                  |
| Ligands                                          | 164.08                               | 158.45                                  | 237.49                                   | 194.42                                   | 82.54                                   |
| R.m.s. deviations                                |                                      |                                         |                                          |                                          |                                         |
| Bond lengths (Å)                                 | 0.005                                | 0.003                                   | 0.004                                    | 0.007                                    | 0.003                                   |
| Bond angles (°)                                  | 0.756                                | 0.606                                   | 0.509                                    | 0.658                                    | 0.524                                   |
| Validation                                       |                                      |                                         |                                          |                                          |                                         |
| MolProbity score                                 | 1.77                                 | 1.72                                    | 1.69                                     | 1.63                                     | 1.67                                    |
| Clashscore                                       | 9.25                                 | 10.84                                   | 9.85                                     | 7.55                                     | 7.63                                    |
| Poor rotamers (%)                                | 0.16                                 | 0.00                                    | 0.00                                     | 0.00                                     | 0.00                                    |
| CaBLAM outliers                                  | 1.93                                 | 1.73                                    | 1.63                                     | 1.91                                     | 2.07                                    |
| Cβ outliers                                      | 0.00                                 | 0.00                                    | 0.00                                     | 0.00                                     | 0.00                                    |
| Ramachandran plot                                |                                      |                                         |                                          |                                          |                                         |
| Favored (%)                                      | 95.91                                | 97.01                                   | 97.03                                    | 96.68                                    | 96.27                                   |
| Allowed (%)                                      | 4.09                                 | 2.99                                    | 2.97                                     | 3.32                                     | 3.73                                    |
| Disallowed (%)                                   | 0.00                                 | 0.00                                    | 0.00                                     | 0.00                                     | 0.00                                    |

1123

1124

1125
